# Supplementary material
Source: publisher figshare collection journal article supplement (https://acs.figshare.com/ndownloader/files/4583122)
Supplement: Supplementary file 1 [file 4583122]

## Supporting Information

# Use of Multiparametric Techniques to Quantify the Effects of Naturally Occurring Ligands on the Kinetics of Fe(II) Oxidation

*Preston S. Craig<sup>1</sup>, Timothy J. Shaw<sup>1</sup>, Penney L. Miller<sup>2</sup>, Perry J. Pellechia<sup>1</sup>, John L.  
Ferry<sup>1\*</sup>*

AUTHOR ADDRESS <sup>1</sup>\*Department of Chemistry and Biochemistry, University of South  
Carolina, 631 Sumter St., Columbia, SC 29208, v 803-777-2646, f 803-777-9521. <sup>2</sup>  
Department of Chemistry, Rose-Hulman Institute of Technology, 5500 Wabash Ave,  
Terre Haute IN 47803

AUTHOR EMAIL ferry@mail.chem.sc.edu

Environmental Science and Technology, 10/24/2008

S3- Supp. Table 1. Experimental conditions and results for all 43 experimental conditions

S4- Supp. Table 2. Elemental composition for each type of organic matter used

S5- Supp. Table 3. Results for the 7 experimental conditions investigated for the various  
types of organic matter.

S6- Supp. Table 4. Experimental conditions for the field samples

S7 – Supp. Figure 1.  $k_{\text{obs}}$  for Fe(II) oxidation vs. the activity of  $\text{HO}^-$

S8 – Supp. Figure 2.  $k_{\text{obs}}$  for Fe(II) oxidation vs. ionic strength

S9 – General conditions for  $^{13}\text{C}$  NMR Spectra (Supp. Figure 3; 1-7)

S10 – S16 – Supp. Figure 3.(1-7) Solid state  $^{13}\text{C}$  spectra for the natural organic matter used

S17 – S59 – Supp. Figure 1.(1-43). Plots of Fe(II) oxidation for each condition

S60 – S63 – Supp. Information for location and isolation method for NOM,HA, and FA supplied by the IHSS

**Supp. Table 1. Elemental Composition for All Organic Matter Used (Received from the IHSS)**

| Sample                                                                                                                                                                                                                                                                                                                                                                                                                                                                                                                                                                                                                                                                                                                                                                                      | Cat. No. | H <sub>2</sub> O | Ash  | C     | H    | O     | N    | S    | P     | δ <sup>13</sup> C | δ <sup>15</sup> N |
|---------------------------------------------------------------------------------------------------------------------------------------------------------------------------------------------------------------------------------------------------------------------------------------------------------------------------------------------------------------------------------------------------------------------------------------------------------------------------------------------------------------------------------------------------------------------------------------------------------------------------------------------------------------------------------------------------------------------------------------------------------------------------------------------|----------|------------------|------|-------|------|-------|------|------|-------|-------------------|-------------------|
| Suwannee River-NOM                                                                                                                                                                                                                                                                                                                                                                                                                                                                                                                                                                                                                                                                                                                                                                          | 1R101N   | 8.15             | 7.0  | 52.47 | 4.19 | 42.69 | 1.10 | 0.65 | 0.02  | nd                | nd                |
| Suwannee River-HA                                                                                                                                                                                                                                                                                                                                                                                                                                                                                                                                                                                                                                                                                                                                                                           | 2S101H   | 20.4             | 1.04 | 52.63 | 4.28 | 42.04 | 1.17 | 0.54 | 0.013 | nd                | nd                |
| Suwannee River-FA                                                                                                                                                                                                                                                                                                                                                                                                                                                                                                                                                                                                                                                                                                                                                                           | 2S101F   | 16.9             | 0.58 | 52.34 | 4.36 | 42.98 | 0.67 | 0.46 | 0.004 | nd                | nd                |
| Nordic Reservoir - NOM                                                                                                                                                                                                                                                                                                                                                                                                                                                                                                                                                                                                                                                                                                                                                                      | 1R108N   | nd               | 41.4 | 53.17 | 5.67 | nd    | 1.10 | nd   | nd    | nd                | nd                |
| Nordic Reservoir - HA                                                                                                                                                                                                                                                                                                                                                                                                                                                                                                                                                                                                                                                                                                                                                                       | 1R105H   | 9.1              | 0.31 | 53.33 | 3.97 | 43.09 | 1.16 | 0.58 | 0.01  | - 27.8            | -1.55             |
| Nordic Reservoir - FA                                                                                                                                                                                                                                                                                                                                                                                                                                                                                                                                                                                                                                                                                                                                                                       | 1R105F   | 9.2              | 0.45 | 52.31 | 3.98 | 45.12 | 0.68 | 0.46 | <0.01 | - 27.8            | -3.19             |
| Pony Lake - FA                                                                                                                                                                                                                                                                                                                                                                                                                                                                                                                                                                                                                                                                                                                                                                              | 1R109F   | 4.32             | 1.25 | 52.47 | 5.39 | 31.38 | 6.51 | 3.03 | 0.55  | nd                | nd                |
| Source: Elemental analyses by Huffman Laboratories, Wheat Ridge, CO, USA; Isotopic analyses by Soil Biochemistry Laboratory, Dept. of Soil, Water, and Climate, University of Minnesota, St. Paul, MN, USA. H <sub>2</sub> O content is the %(w/w) of H <sub>2</sub> O in the air-equilibrated sample (a function of relative humidity). Ash is the %(w/w) of inorganic residue in a dry sample. C, H, O, N, S, and P are the elemental composition in %(w/w) of a dry, ash-free sample. δ <sup>13</sup> C and δ <sup>15</sup> N are the abundances of the respective stable isotopes in units of per mil, or o/oo. The data for bulk source materials are reported on an as-stored basis, except that %H and %O are corrected for water content. nd means that an item was not determined. |          |                  |      |       |      |       |      |      |       |                   |                   |

**Supp. Table 2.** Experimental parameters and average  $k_{\text{obs}}$  for each of the 43 experimental conditions for Fe(II) oxidation for each condition. N = 3 for experimental conditions #1-#42, N = 6 for the center point condition (#43), mean RSD 21.2%

| Experimental Condition | Experimental parameters |                                    |                                                                   |                     |            | Results                |                                               |         |
|------------------------|-------------------------|------------------------------------|-------------------------------------------------------------------|---------------------|------------|------------------------|-----------------------------------------------|---------|
|                        | Cl <sup>-</sup> (mM)    | SO <sub>4</sub> <sup>2-</sup> (mM) | HCO <sub>3</sub> <sup>-</sup> /CO <sub>3</sub> <sup>2-</sup> (mM) | F <sup>-</sup> (μM) | NOM (mg/L) | Average R <sup>2</sup> | Average $k_{\text{obs}}$ (x10 <sup>-4</sup> ) | RSD (%) |
| 1                      | 316.4                   | 16.4                               | 1.41                                                              | 38.9                | 8.7        | 0.973                  | 64                                            | 13.9    |
| 2                      | 777.5                   | 16.4                               | 1.41                                                              | 38.9                | 8.7        | 0.997                  | 158                                           | 32.9    |
| 3                      | 316.4                   | 40.1                               | 1.41                                                              | 38.9                | 8.7        | 0.992                  | 69                                            | 13.8    |
| 4                      | 777.5                   | 40.1                               | 1.41                                                              | 38.9                | 8.7        | 0.989                  | 56                                            | 16.8    |
| 5                      | 316.4                   | 16.4                               | 3.14                                                              | 38.9                | 8.7        | 0.978                  | 218                                           | 31.9    |
| 6                      | 777.5                   | 16.4                               | 3.14                                                              | 38.9                | 8.7        | 0.996                  | 248                                           | 8.5     |
| 7                      | 316.4                   | 40.1                               | 3.14                                                              | 38.9                | 8.7        | 0.997                  | 195                                           | 19.7    |
| 8                      | 777.5                   | 40.1                               | 3.14                                                              | 38.9                | 8.7        | 0.954                  | 242                                           | 19.8    |
| 9                      | 316.4                   | 16.4                               | 1.41                                                              | 95.8                | 8.7        | 0.998                  | 87                                            | 14.1    |
| 10                     | 777.5                   | 16.4                               | 1.41                                                              | 95.8                | 8.7        | 0.995                  | 68                                            | 26.8    |
| 11                     | 316.4                   | 40.1                               | 1.41                                                              | 95.8                | 8.7        | 0.984                  | 34                                            | 22.2    |
| 12                     | 777.5                   | 40.1                               | 1.41                                                              | 95.8                | 8.7        | 0.994                  | 67                                            | 16.5    |
| 13                     | 316.4                   | 16.4                               | 3.14                                                              | 95.8                | 8.7        | 0.984                  | 189                                           | 20.1    |
| 14                     | 777.5                   | 16.4                               | 3.14                                                              | 95.8                | 8.7        | 0.992                  | 218                                           | 30.5    |
| 15                     | 316.4                   | 40.1                               | 3.14                                                              | 95.8                | 8.7        | 0.992                  | 130                                           | 27.8    |
| 16                     | 777.5                   | 40.1                               | 3.14                                                              | 95.8                | 8.7        | 0.998                  | 213                                           | 19.0    |
| 17                     | 316.4                   | 16.4                               | 1.41                                                              | 38.9                | 21.3       | 0.990                  | 86                                            | 20.1    |
| 18                     | 777.5                   | 16.4                               | 1.41                                                              | 38.9                | 21.3       | 0.997                  | 102                                           | 33.0    |
| 19                     | 316.4                   | 40.1                               | 1.41                                                              | 38.9                | 21.3       | 0.968                  | 90                                            | 22.9    |
| 20                     | 777.5                   | 40.1                               | 1.41                                                              | 38.9                | 21.3       | 0.998                  | 142                                           | 32.9    |
| 21                     | 316.4                   | 16.4                               | 3.14                                                              | 38.9                | 21.3       | 0.996                  | 206                                           | 18.9    |
| 22                     | 777.5                   | 16.4                               | 3.14                                                              | 38.9                | 21.3       | 0.998                  | 266                                           | 29.9    |
| 23                     | 316.4                   | 40.1                               | 3.14                                                              | 38.9                | 21.3       | 0.994                  | 234                                           | 29.4    |
| 24                     | 777.5                   | 40.1                               | 3.14                                                              | 38.9                | 21.3       | 0.999                  | 184                                           | 8.2     |
| 25                     | 316.4                   | 16.4                               | 1.41                                                              | 95.8                | 21.3       | 0.993                  | 111                                           | 18.7    |
| 26                     | 777.5                   | 16.4                               | 1.41                                                              | 95.8                | 21.3       | 0.996                  | 91                                            | 20.0    |
| 27                     | 316.4                   | 40.1                               | 1.41                                                              | 95.8                | 21.3       | 0.990                  | 85                                            | 18.5    |
| 28                     | 777.5                   | 40.1                               | 1.41                                                              | 95.8                | 21.3       | 0.995                  | 101                                           | 25.6    |
| 29                     | 316.4                   | 16.4                               | 3.14                                                              | 95.8                | 21.3       | 0.993                  | 278                                           | 16.6    |
| 30                     | 777.5                   | 16.4                               | 3.14                                                              | 95.8                | 21.3       | 0.995                  | 303                                           | 12.9    |
| 31                     | 316.4                   | 40.1                               | 3.14                                                              | 95.8                | 21.3       | 0.997                  | 206                                           | 27.3    |
| 32                     | 777.5                   | 40.1                               | 3.14                                                              | 95.8                | 21.3       | 0.995                  | 163                                           | 11.6    |
| 33                     | 0                       | 28.2                               | 2.28                                                              | 67.4                | 15         | 0.993                  | 172                                           | 33.6    |
| 34                     | 1091.8                  | 28.2                               | 2.28                                                              | 67.4                | 15         | 0.998                  | 204                                           | 29.1    |
| 35                     | 545.9                   | 0                                  | 2.28                                                              | 67.4                | 15         | 0.995                  | 253                                           | 8.2     |
| 36                     | 545.9                   | 56.4                               | 2.28                                                              | 67.4                | 15         | 0.994                  | 88                                            | 29.2    |
| 37                     | 545.9                   | 28.2                               | 0.21                                                              | 67.4                | 15         | 0.783                  | 9                                             | 34.4    |
| 38                     | 545.9                   | 28.2                               | 4.34                                                              | 67.4                | 15         | 0.996                  | 311                                           | 7.1     |
| 39                     | 545.9                   | 28.2                               | 2.28                                                              | 0                   | 15         | 0.987                  | 192                                           | 29.2    |
| 40                     | 545.9                   | 28.2                               | 2.28                                                              | 134.8               | 15         | 0.999                  | 122                                           | 6.8     |
| 41                     | 545.9                   | 28.2                               | 2.28                                                              | 67.4                | 0          | 0.996                  | 47                                            | 20.0    |
| 42                     | 545.9                   | 28.2                               | 2.28                                                              | 67.4                | 30         | 0.998                  | 198                                           | 14.9    |
| 43                     | 545.9                   | 28.2                               | 2.28                                                              | 67.4                | 15         | 0.993                  | 161                                           | 17.1    |

**Supp. Table 3. Normalized rates for the 7 experimental conditions investigated for the other types of organic matter.** Experimental condition #1 contains no NOM, so the normalized values are the same for all types of organic matter. The error values are one standard deviation. The error for the average values was calculated by pooling the standard deviation for the seven error values in the associated column.

| Exp.<br>condition # | Coded<br>HCO <sub>3</sub> <sup>-</sup><br>value | Coded<br>NOM<br>value | NLNOM         | NLFA              | NLHA              | SRNOM             | SRHA              | SRFA              | PLFA               |
|---------------------|-------------------------------------------------|-----------------------|---------------|-------------------|-------------------|-------------------|-------------------|-------------------|--------------------|
| 7                   | +1                                              | -1                    | 1<br>± 0.2756 | 0.9436<br>±0.1896 | 0.9128<br>±0.2286 | 0.7179<br>±0.1705 | 0.7231<br>±0.2242 | 0.8154<br>±0.1618 | 0.3795<br>±0.0767  |
| 11                  | -1                                              | -1                    | 1<br>±0.3328  | 1.5882<br>±0.4267 | 1.3824<br>±0.3700 | 1.5588<br>±0.3680 | 2.3529<br>±0.7266 | 1.5294<br>±0.4839 | 1.0294<br>±0.2997  |
| 22                  | +1                                              | +1                    | 1<br>±0.4200  | 0.7256<br>±0.3092 | 0.5113<br>±0.1595 | 0.6429<br>±0.2454 | 1.1429<br>±0.3532 | 1.1842<br>±0.3717 | 0.5263<br>±0.1570  |
| 26                  | -1                                              | +1                    | 1<br>±0.2797  | 1.0769<br>±0.2397 | 0.8791<br>±0.1824 | 0.8901<br>±0.2136 | 1.0220<br>±0.2735 | 0.6703<br>±0.1366 | 0.8242<br>±0.2168  |
| 41                  | 0                                               | -2                    | 1<br>±0.2708  | 1<br>±0.2708      | 1<br>±0.2708      | 1<br>±0.2780      | 1<br>±0.2708      | 1<br>±0.2708      | 1<br>±0.2708       |
| 42                  | 0                                               | +2                    | 1<br>±0.2143  | 0.8990<br>±0.1491 | 0.5303<br>±0.1006 | 0.6616<br>±0.1423 | 0.6212<br>±0.1093 | 0.4343<br>±0.0666 | 0.3939<br>±0.00721 |
| 43                  | 0                                               | 0                     | 1<br>±0.2460  | 0.6460<br>±0.1675 | 0.6398<br>±0.1668 | 0.8944<br>±0.1846 | 0.5963<br>±0.1394 | 0.4845<br>±0.0978 | 0.5217<br>±0.1301  |
| average             |                                                 |                       | 1<br>±0.2894  | 0.9828<br>±0.2513 | 0.8365<br>±0.2172 | 0.9094<br>±0.2298 | 1.0655<br>±0.3277 | 0.8740<br>±0.2471 | 0.6679<br>±0.1841  |

**Supp. Table 4.** Experimental parameters obtained from field measurements of Pacific Ocean and Congaree River waters.

|                       | <b>Concentrations (mg/L)</b>     |                                               |                                               |                                 |                        |
|-----------------------|----------------------------------|-----------------------------------------------|-----------------------------------------------|---------------------------------|------------------------|
|                       | <b>Cl<sup>-</sup><br/>(mg/L)</b> | <b>HCO<sub>3</sub><sup>-</sup><br/>(mg/L)</b> | <b>SO<sub>4</sub><sup>2-</sup><br/>(mg/L)</b> | <b>F<sup>-</sup><br/>(mg/L)</b> | <b>NOM<br/>(mgC/L)</b> |
| <b>Pacific 3.2</b>    | 17400                            | 115.83                                        | 2440                                          | 0.6                             | 0.972                  |
| <b>Pacific 109</b>    | 17400                            | 102.79                                        | 2440                                          | 0.55                            | 0.972                  |
| <b>Congaree river</b> | 552                              | 24.187                                        | 77.4                                          | 0.11                            | 5.75                   |

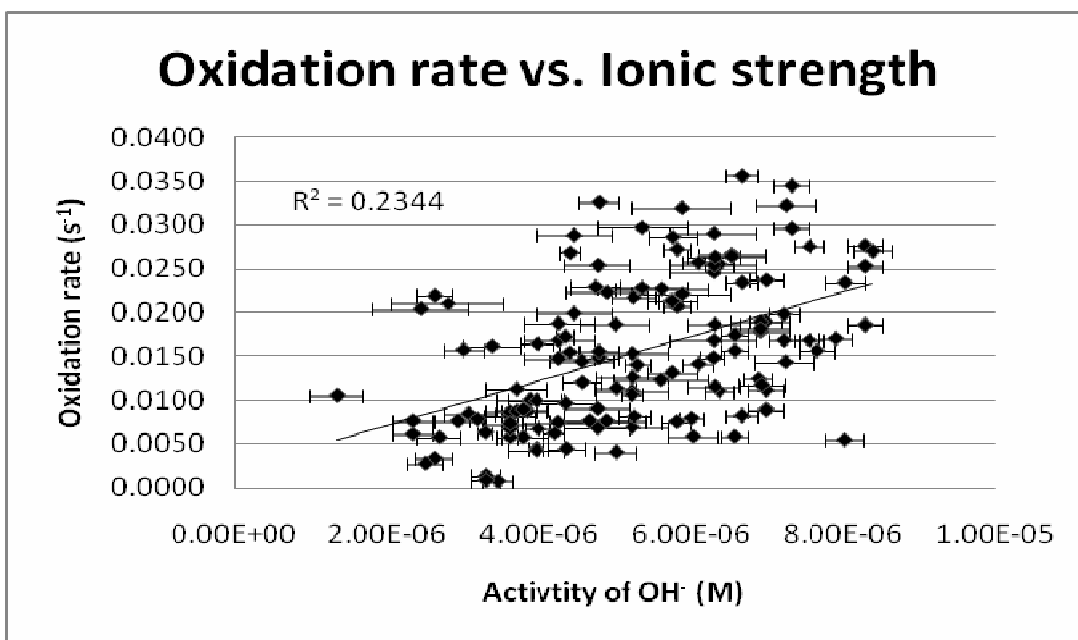

**Supp. Figure 1.** Rate of Fe(II) oxidation vs. the activity of  $HO^-$ . The activity of  $HO^-$  did not correlate with  $k_{obs}$  over the pH range of these experiments ( $pH\ 8.34 \pm 0.13$ ). Activity of  $HO^-$  was calculated based on pH probe responses to the pH 8 NBS buffer against a range of ionic strengths. Ionic strength adjustment was achieved with NaCl addition. NaCl was chosen because it is the primary source of ionic strength for the experiments in the matrix.  $K_w$  for the  $HO^-$  activity estimations was obtained from Millero *et al*, *The oxidation kinetics of Fe(II) in seawater*, *Geochimica et Cosmochimica Acta*, (51), p 793-801, 1987.

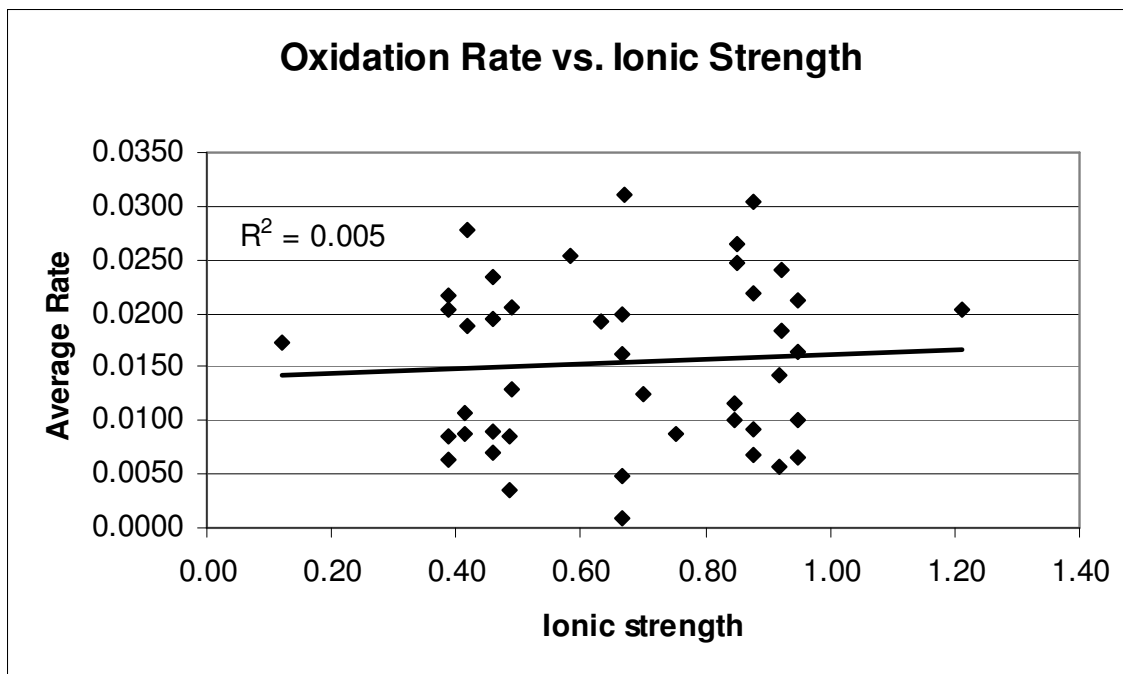

**Supp. Figure 2.** Plot of average Fe(II) oxidation rate vs. the ionic strength for each experimental condition. This plot show that there is no correlation between the Fe(II) oxidation rate and ionic strength.



**General conditions for  $^{13}\text{C}$  NMR Spectra (Supp. Figure 3; 1-7).** Solid state  $^{13}\text{C}$  NMR spectra for each type of natural organic matter studied in this work.  $^{13}\text{C}$  CP-MAS spectra were collected on a Varian Unity Inova 500 MHz spectrometer fitted with a Doty 4mm XC MAS probe. The spectra were collected at ambient temperature with sample rotation rate of 6 kHz. TOSS sideband suppression was used as well as TPPM decoupling at a  $^1\text{H}$  field strength of 64kHz (3.9 $\mu\text{sec}$  90° pulse width) . A 1.5 msec contact time with a tangential amplitude ramped on the  $^{13}\text{C}$  RF channel. Free induction decays were collected with a 40 msec acquisition time over a 400 ppm spectra width. The number of transients varied from 464 to 53520 and a 1.5 sec relaxation delay was used. The data was weighted with a 150 Hz line broadened function prior to Fourier transformation. Integrals for each functional group were assigned based those used by the IHSS.(K. A. Thorn, D. W. Folan, and P. MacCarthy (1989), *Characterization of the International Humic Substances Society Standard and Reference Fulvic and Humic Acids by Solution State Carbon-13 ( $^{13}\text{C}$ ) and Hydrogen-1 ( $^1\text{H}$ ) Nuclear Magnetic Resonance Spectrometry*, U.S. Geological Survey, Water-Resources Investigations Report 89-4196, Denver, CO, 93 pp.)

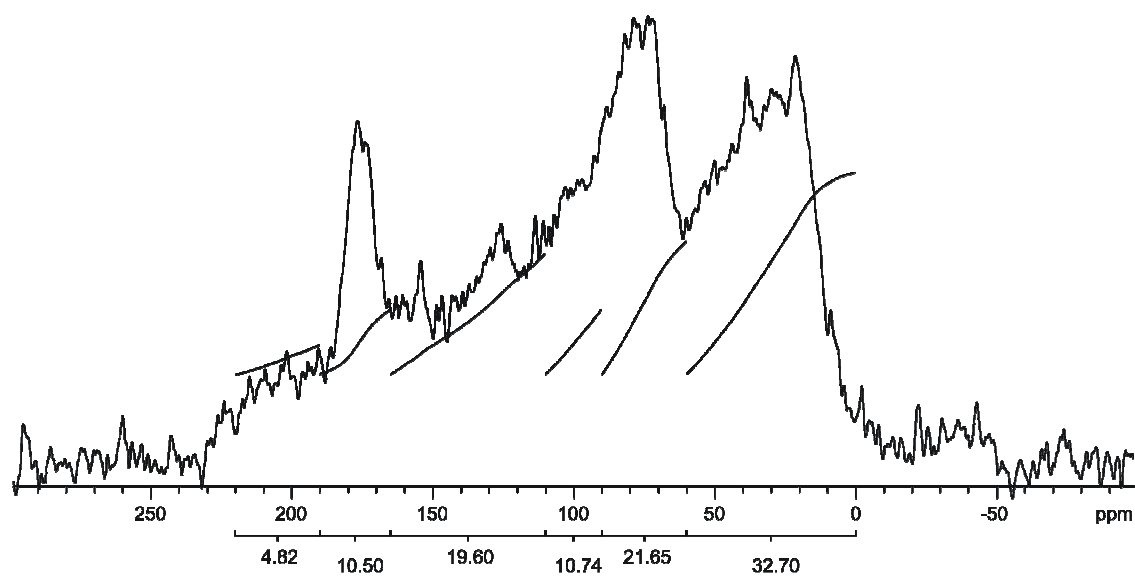

**Supp. Figure 3.1**  $^{13}\text{C}$  CP-MAS spectra for the Nordic reservoir natural organic matter used. % Carbonyl = 4.82, % Carboxyl = 10.50. % Aromatic = 19.60, % Acetal = 10.74, % Heteroaliphatic = 21.65, % Aliphatic = 32.70.

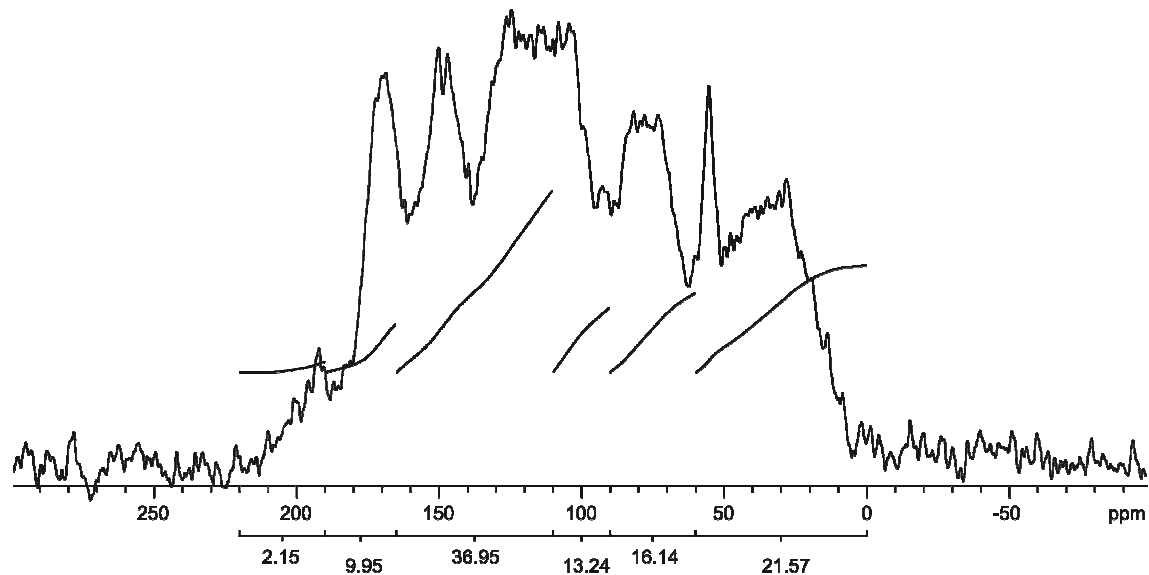

**Supp. Figure 3.2**  $^{13}\text{C}$  CP-MAS spectra for the Nordic reservoir humic acid used. % Carbonyl = 2.15, % Carboxyl = 9.95. % Aromatic = 36.95, % Acetal = 13.24, % Heteroaliphatic = 16.14, % Aliphatic = 21.57.

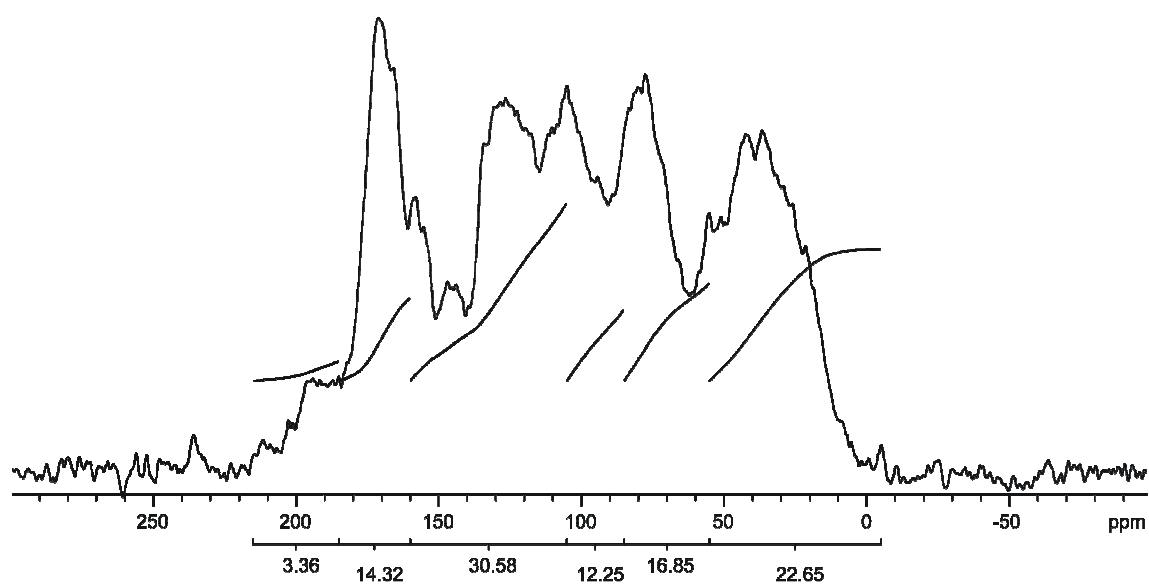

**Supp. Figure 3.3**  $^{13}\text{C}$  CP-MAS spectra for the Nordic reservoir fulvic used. % Carbonyl = 3.36, % Carboxyl = 14.32. % Aromatic = 30.58, % Acetal = 12.25, % Heteroaliphatic = 16.85, % Aliphatic = 22.65.

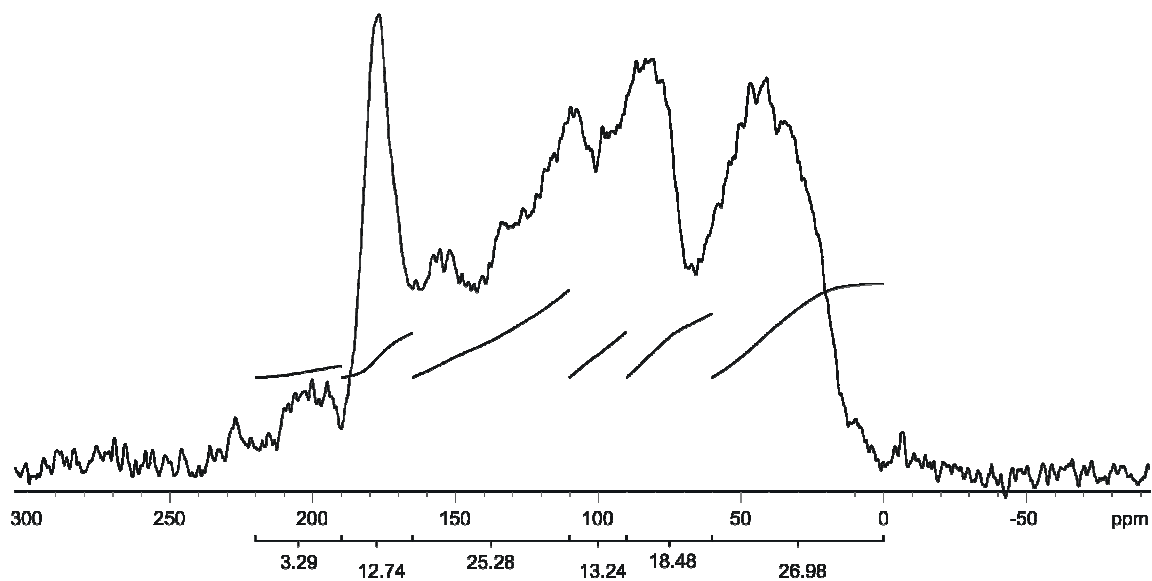

**Supp. Figure 3.4**  $^{13}\text{C}$  CP-MAS spectra for the Suwannee river natural organic matter used. % Carbonyl = 3.29, % Carboxyl = 12.74. % Aromatic = 25.28, % Acetal = 13.24, % Heteroaliphatic = 18.48, % Aliphatic = 26.96.

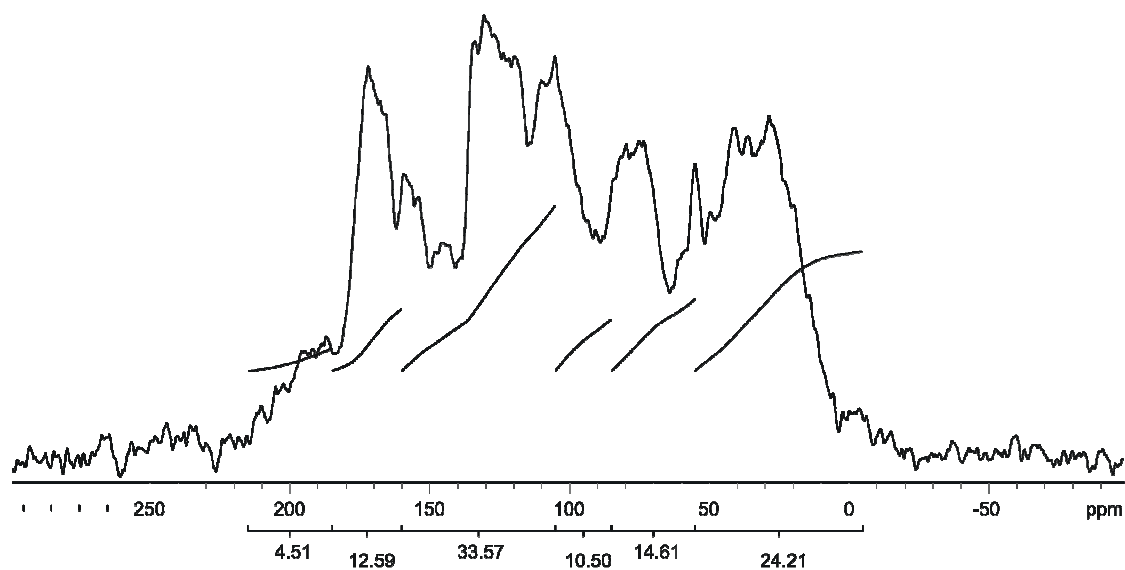

**Supp. Figure 3.5**  $^{13}\text{C}$  CP-MAS spectra for the Suwannee river humic acid used. % Carbonyl = 4.51, % Carboxyl = 12.59, % Aromatic = 33.57, % Acetal = 10.50, % Heteroaliphatic = 14.61, % Aliphatic = 24.21.

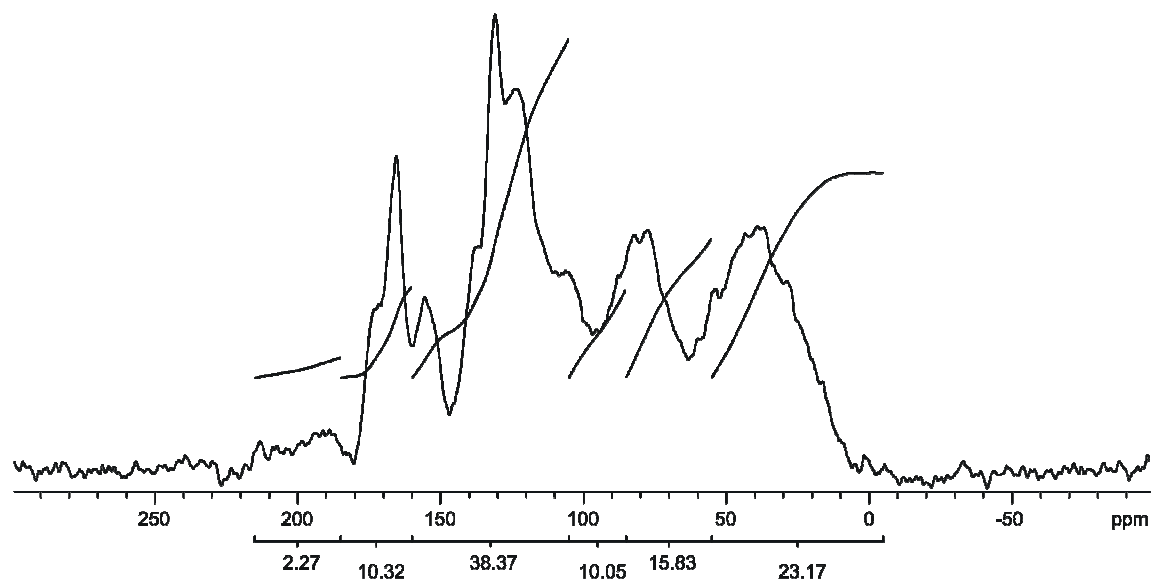

**Supp. Figure 3.6**  $^{13}\text{C}$  CP-MAS spectra for the Suwannee river fulvic acid used. % Carbonyl = 2.27, % Carboxyl = 10.32. % Aromatic = 38.37, % Acetal = 10.05, % Heteroaliphatic = 15.83, % Aliphatic = 23.17.

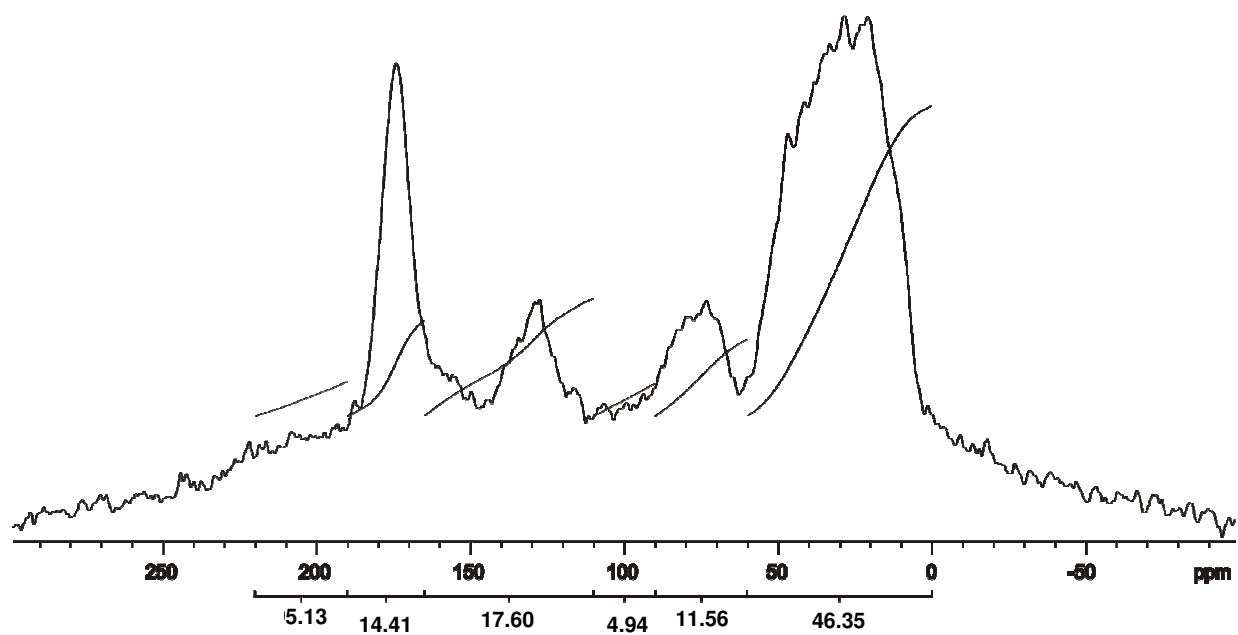

**Supp. Figure 3.7**  $^{13}\text{C}$  CP-MAS spectra for the Pony Lake fulvic acid used. % Carbonyl = 5.13, % Carboxyl = 14.41. % Aromatic = 17.60, % Acetal = 4.94, % Heteroaliphatic = 11.56, % Aliphatic = 46.35.



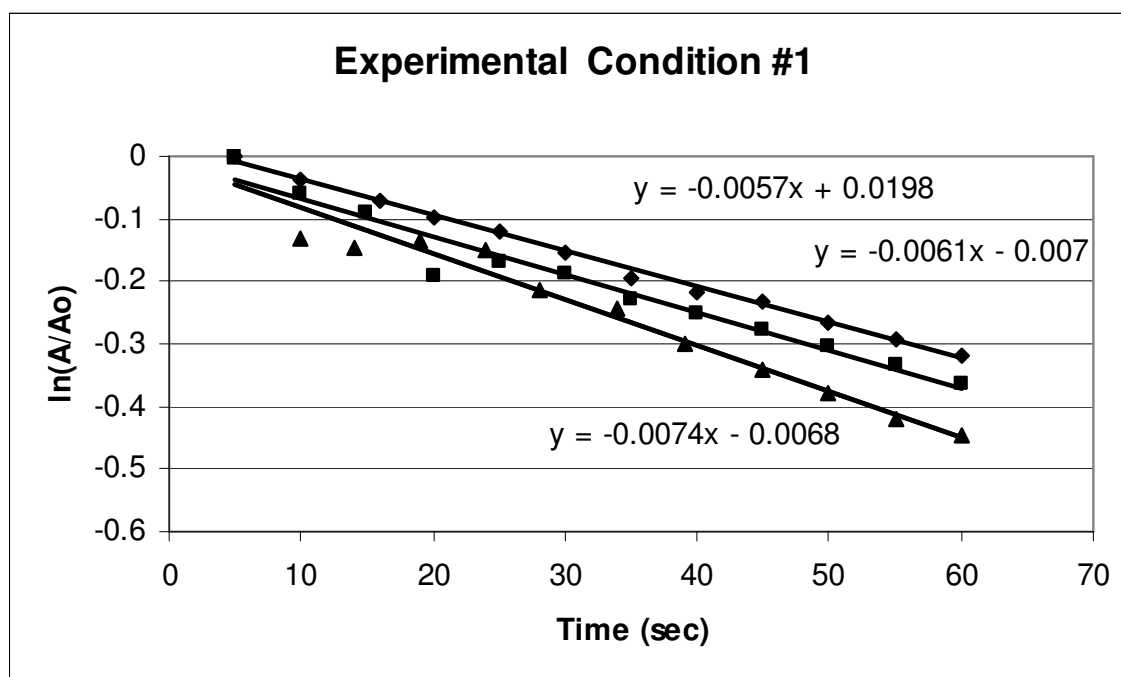

**Supp. Figure 4.1** Experimental condition #1.  $\text{Cl}^- = 316.4 \text{ mM}$ ,  $\text{SO}_4^{2-} = 16.4 \text{ mM}$ ,  $\text{HCO}_3^- / \text{CO}_3^{2-} = 1.41$ ,  $\text{F}^- = 38.9 \text{ }\mu\text{M}$ ,  $\text{NOM} = 8.7 \text{ mg/L}$ ,  $N = 3$ .

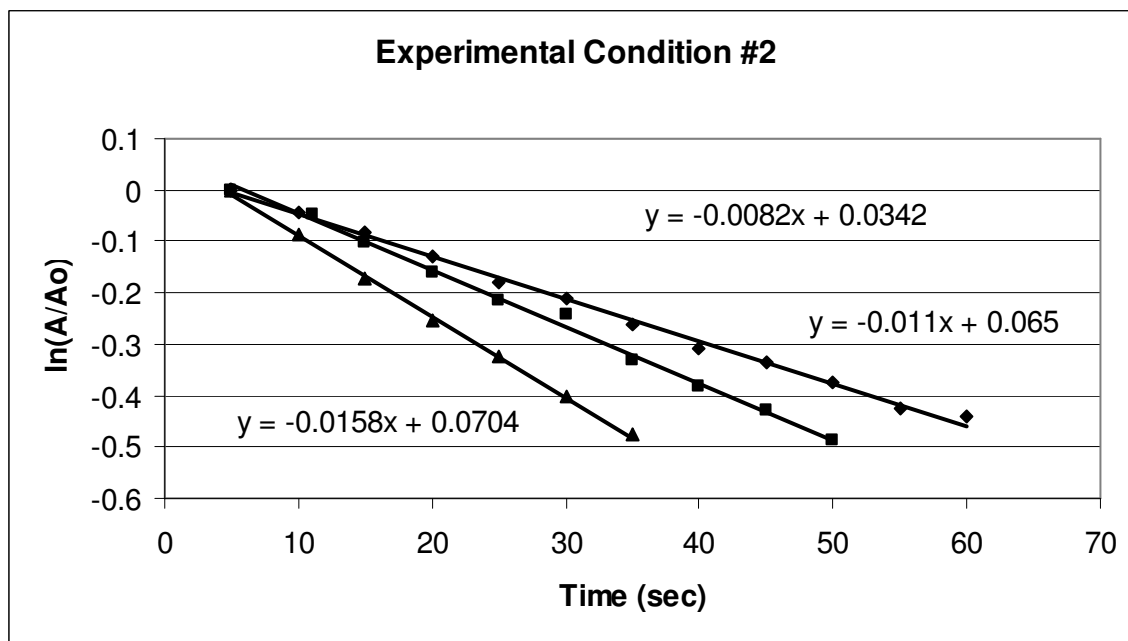

**Supp. Figure 4.2** Experimental condition #2.  $\text{Cl}^- = 777.5 \text{ mM}$ ,  $\text{SO}_4^{2-} = 16.4 \text{ mM}$ ,  $\text{HCO}_3^- / \text{CO}_3^{2-} = 1.41$ ,  $\text{F}^- = 38.9 \text{ }\mu\text{M}$ ,  $\text{NOM} = 8.7 \text{ mg/L}$ ,  $N = 3$ .

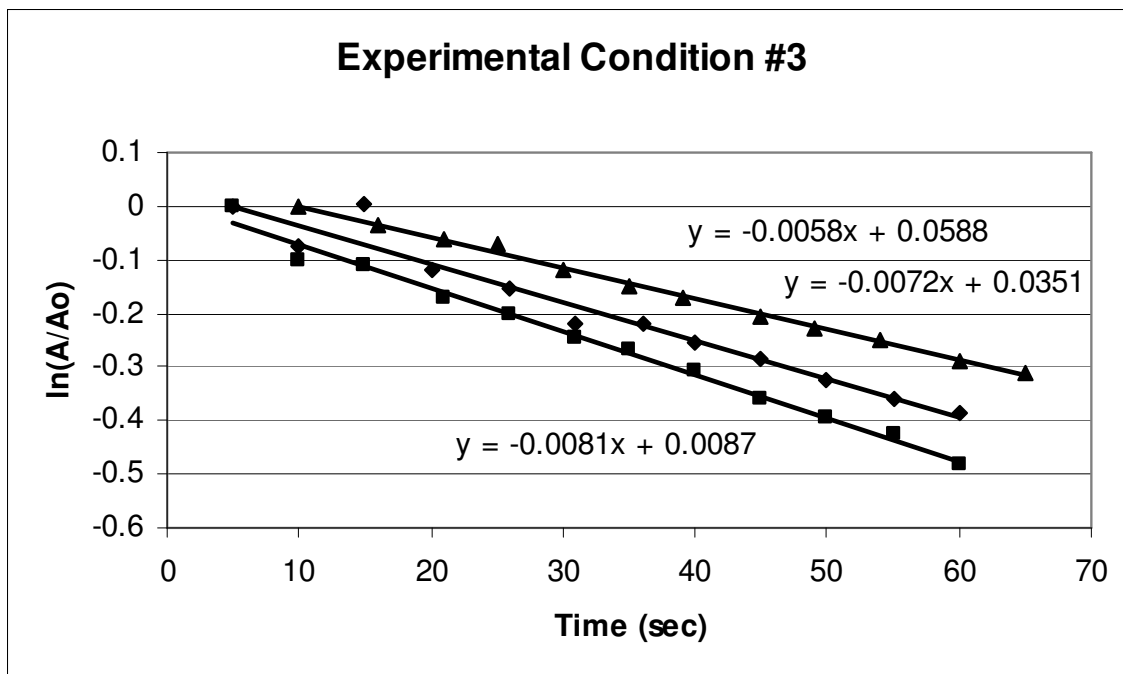

**Supp. Figure 4.3** Experimental condition #3.  $\text{Cl}^- = 316.4 \text{ mM}$ ,  $\text{SO}_4^{2-} = 40.1 \text{ mM}$ ,  $\text{HCO}_3^- / \text{CO}_3^{2-} = 1.41$ ,  $\text{F}^- = 38.9 \text{ }\mu\text{M}$ ,  $\text{NOM} = 8.7 \text{ mg/L}$   $N = 3$ .

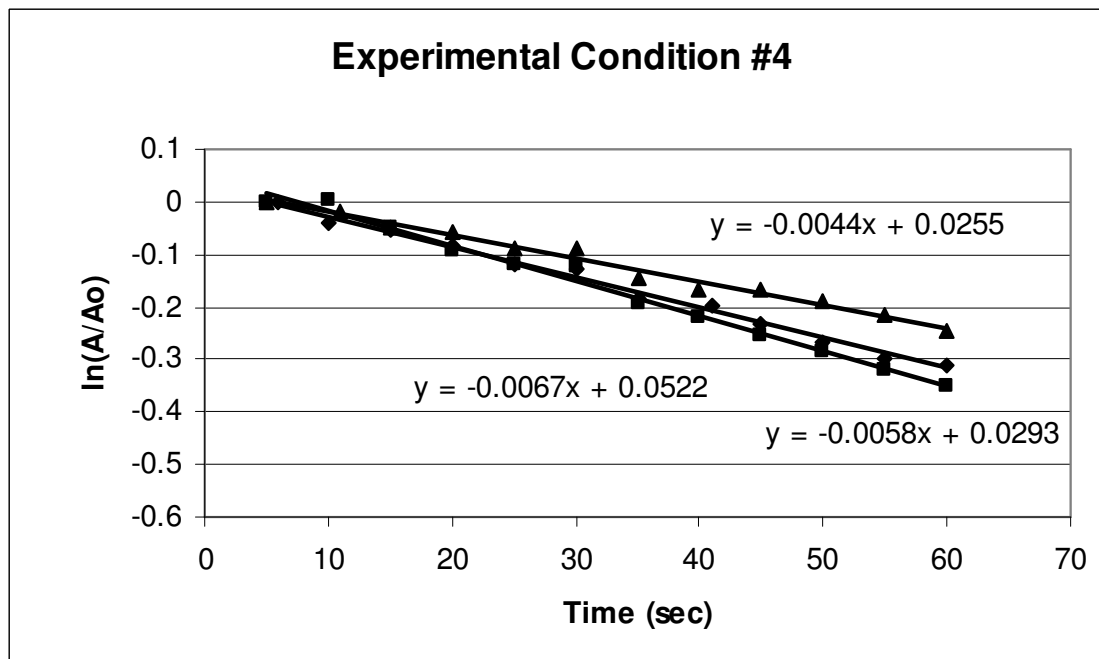

**Supp. Figure 4.4** Experimental condition #4.  $\text{Cl}^- = 777.5 \text{ mM}$ ,  $\text{SO}_4^{2-} = 40.1 \text{ mM}$ ,  $\text{HCO}_3^- / \text{CO}_3^{2-} = 1.41$ ,  $\text{F}^- = 38.9 \text{ }\mu\text{M}$ ,  $\text{NOM} = 8.7 \text{ mg/L}$ ,  $N = 3$ .

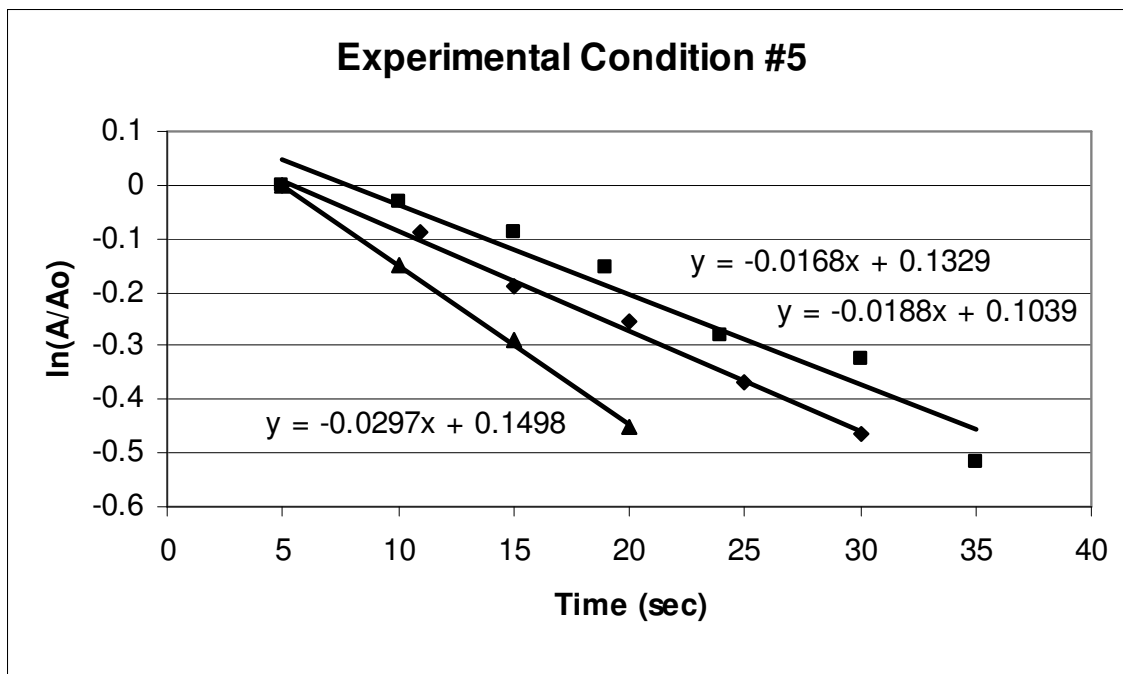

**Supp. Figure 4.5** Experimental condition #5.  $\text{Cl}^- = 316.4 \text{ mM}$ ,  $\text{SO}_4^{2-} = 16.4 \text{ mM}$ ,  $\text{HCO}_3^- / \text{CO}_3^{2-} = 3.14$ ,  $\text{F}^- = 38.9 \text{ }\mu\text{M}$ ,  $\text{NOM} = 8.7 \text{ mg/L}$ ,  $N = 3$ .

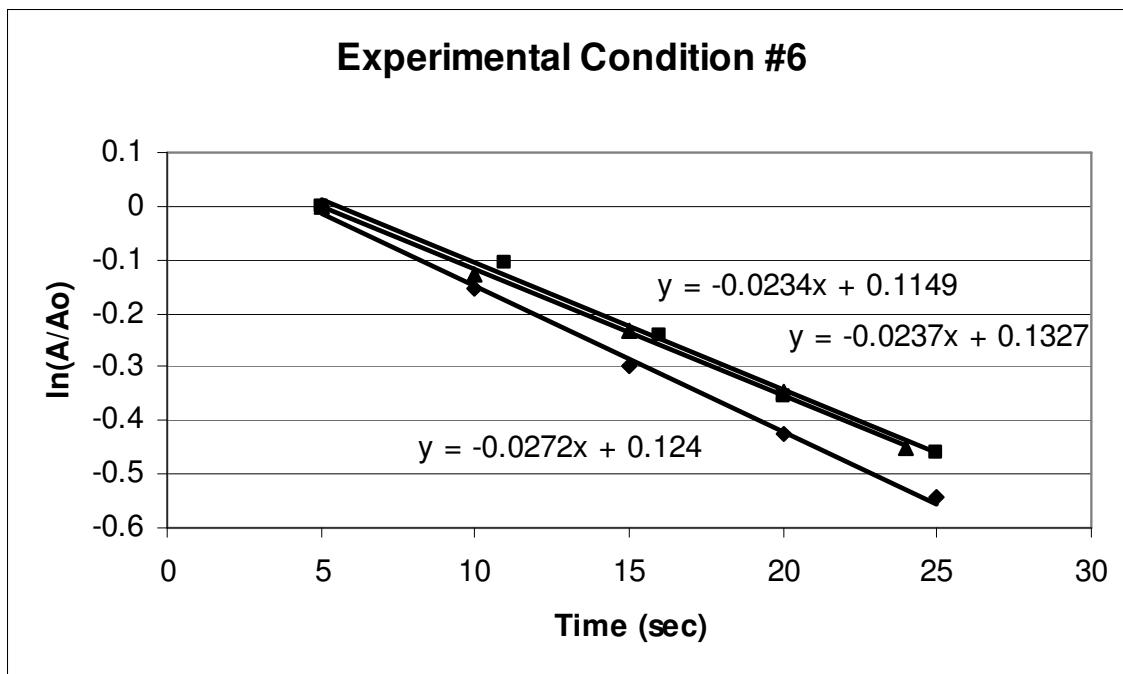

**Supp. Figure 4.6** Experimental condition #6.  $\text{Cl}^- = 777.5 \text{ mM}$ ,  $\text{SO}_4^{2-} = 16.4 \text{ mM}$ ,  $\text{HCO}_3^- / \text{CO}_3^{2-} = 3.14$ ,  $\text{F}^- = 38.9 \text{ }\mu\text{M}$ ,  $\text{NOM} = 8.7 \text{ mg/L}$ ,  $N = 3$ .

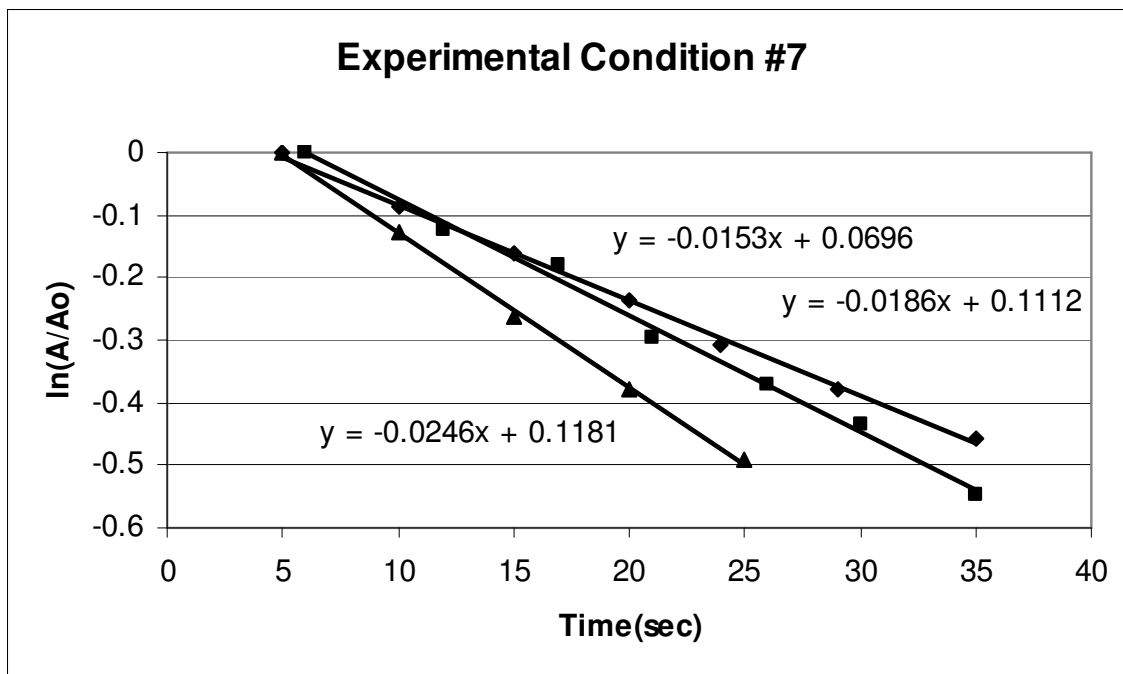

**Supp. Figure 4.7** Experimental condition #7.  $\text{Cl}^- = 316.4 \text{ mM}$ ,  $\text{SO}_4^{2-} = 40.1 \text{ mM}$ ,  $\text{HCO}_3^- / \text{CO}_3^{2-} = 3.14$ ,  $\text{F}^- = 38.9 \text{ } \mu\text{M}$ ,  $\text{NOM} = 8.7 \text{ mg/L}$ ,  $N = 3$ .

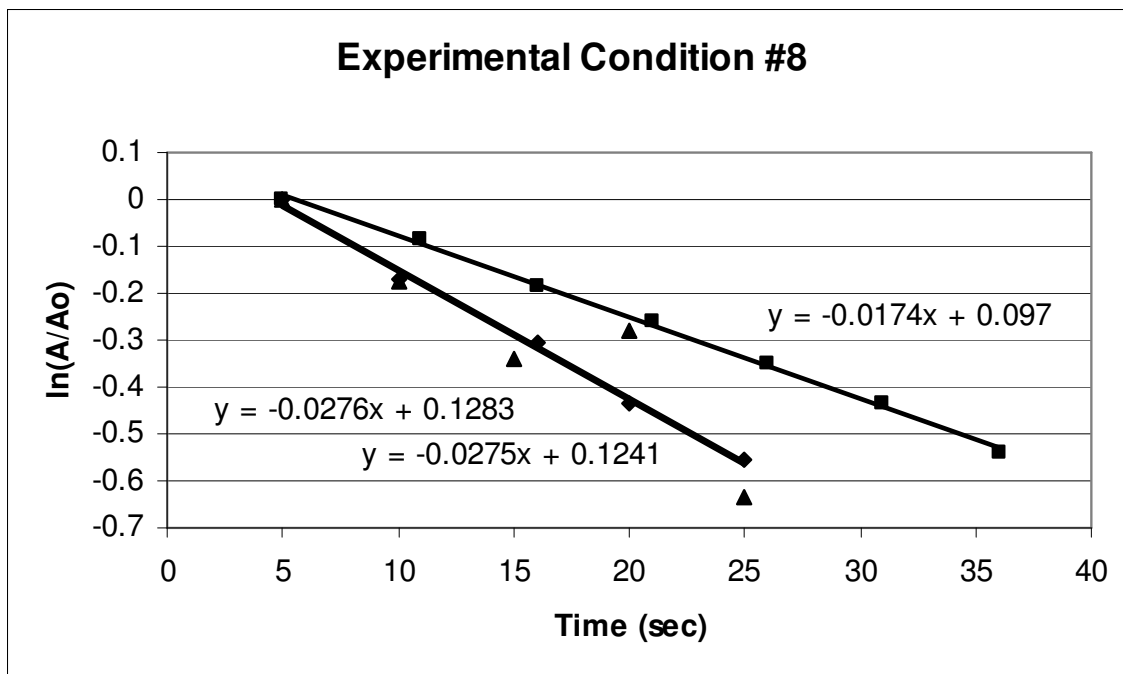

**Supp. Figure 4.8** Experimental condition #8.  $\text{Cl}^- = 777.5 \text{ mM}$ ,  $\text{SO}_4^{2-} = 40.1 \text{ mM}$ ,  $\text{HCO}_3^- / \text{CO}_3^{2-} = 3.14$ ,  $\text{F}^- = 38.9 \text{ }\mu\text{M}$ ,  $\text{NOM} = 8.7 \text{ mg/L}$ ,  $N = 3$ .



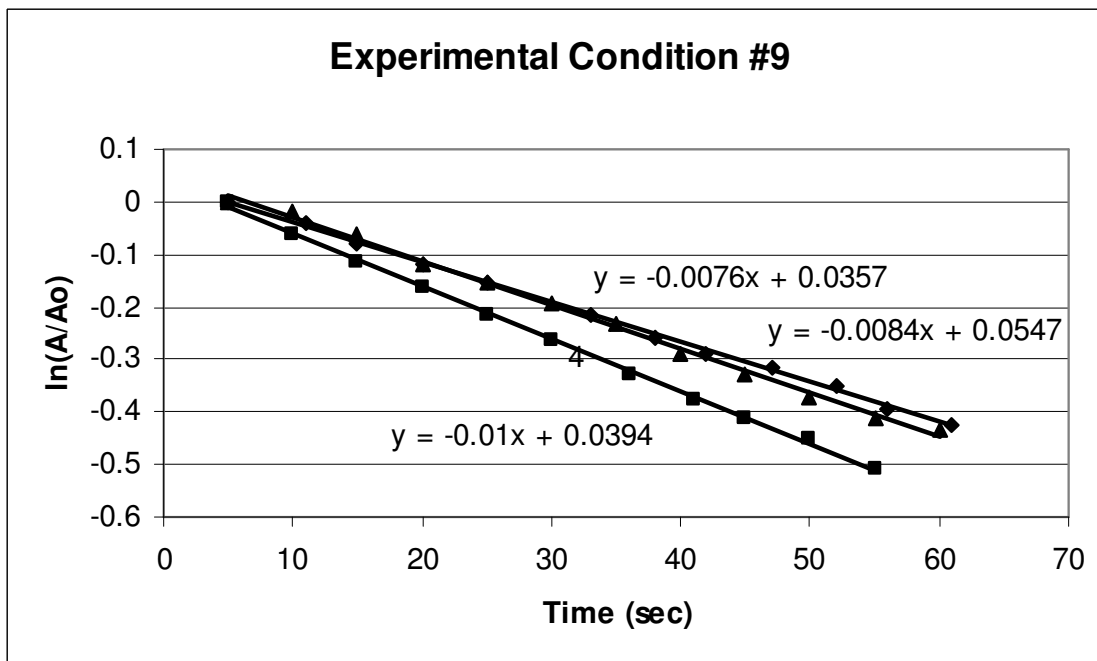

**Supp. Figure 4.9** Experimental condition #9.  $\text{Cl}^- = 316.4 \text{ mM}$ ,  $\text{SO}_4^{2-} = 16.4 \text{ mM}$ ,  $\text{HCO}_3^- / \text{CO}_3^{2-} = 1.41$ ,  $\text{F}^- = 95.8 \text{ }\mu\text{M}$ ,  $\text{NOM} = 8.7 \text{ mg/L}$ ,  $N = 3$ .

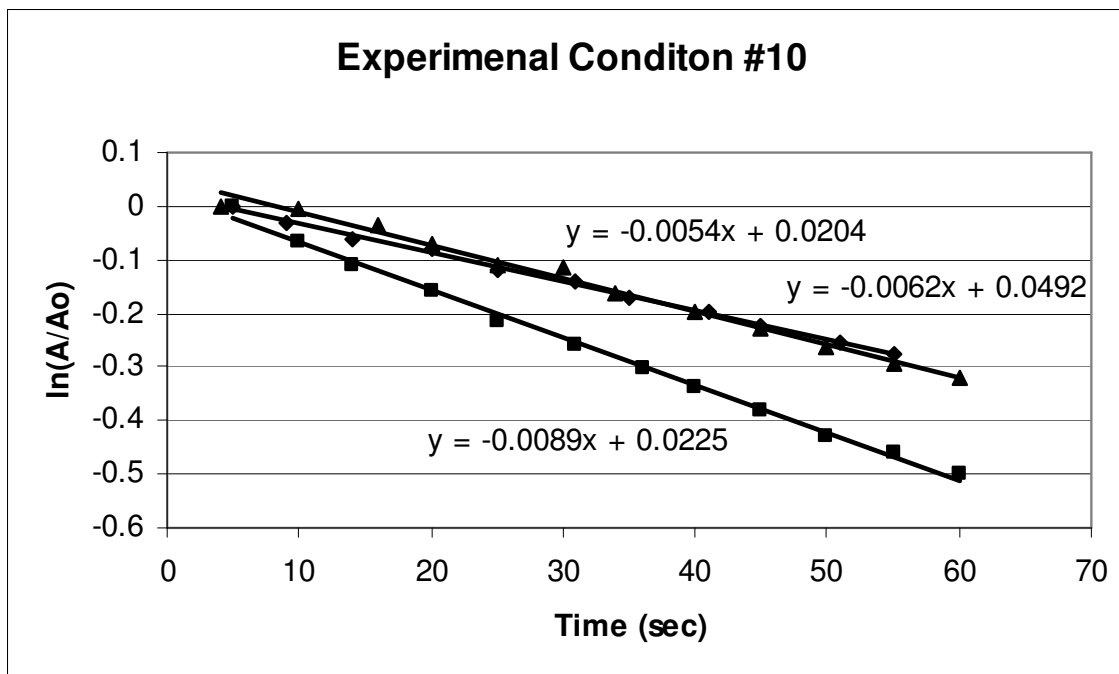

**Supp. Figure 4.10** Experimental condition #10.  $\text{Cl}^- = 777.5 \text{ mM}$ ,  $\text{SO}_4^{2-} = 16.4 \text{ mM}$ ,  $\text{HCO}_3^-/\text{CO}_3^{2-} = 1.41$ ,  $\text{F}^- = 95.8 \text{ }\mu\text{M}$ ,  $\text{NOM} = 8.7 \text{ mg/L}$ ,  $N = 3$ .

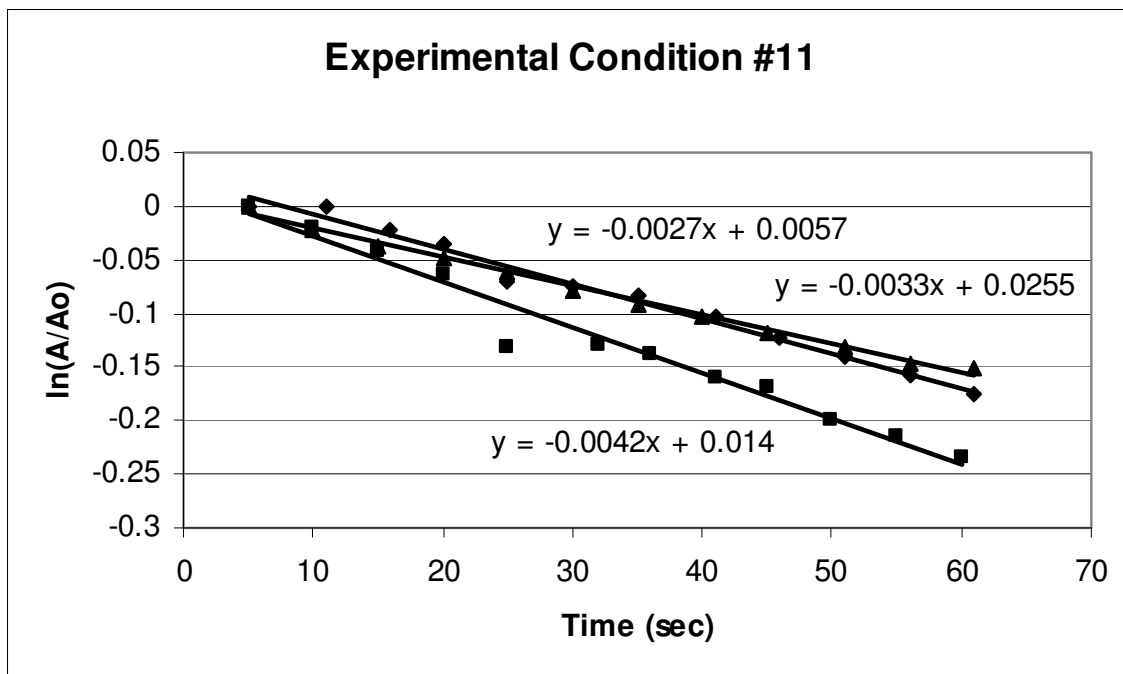

**Supp. Figure 4.11** Experimental condition #11.  $\text{Cl}^- = 316.4 \text{ mM}$ ,  $\text{SO}_4^{2-} = 40.1 \text{ mM}$ ,  $\text{HCO}_3^-/\text{CO}_3^{2-} = 1.41$ ,  $\text{F}^- = 95.8 \text{ }\mu\text{M}$ ,  $\text{NOM} = 8.7 \text{ mg/L}$ ,  $N = 3$ .

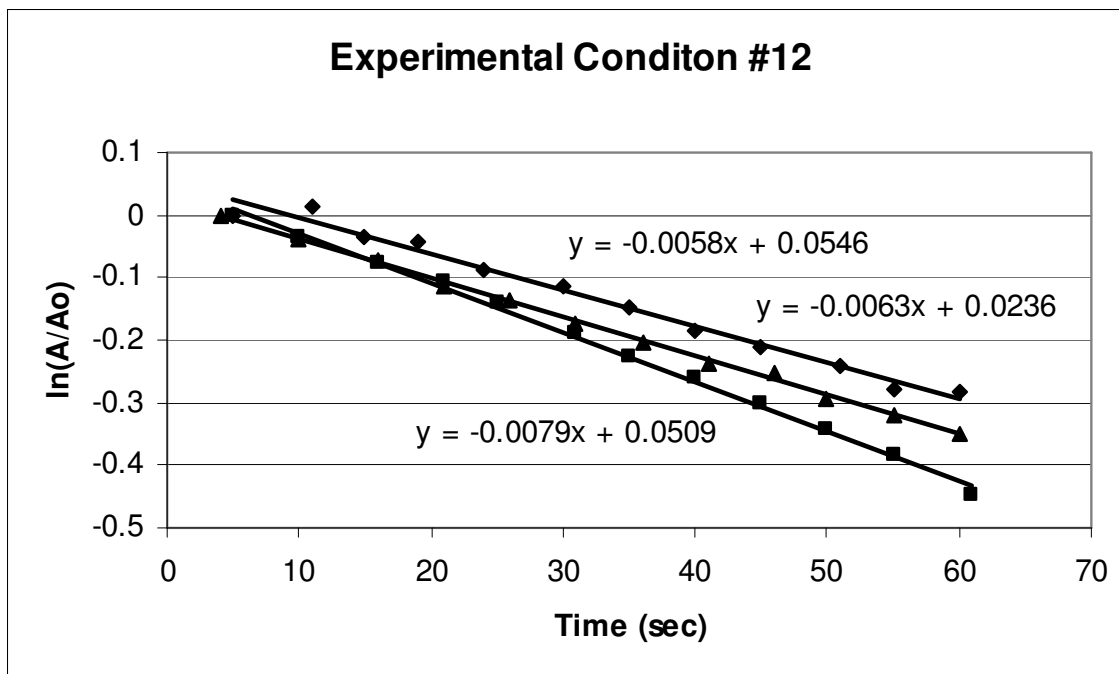

**Supp. Figure 4.12** Experimental condition #12.  $\text{Cl}^- = 777.5 \text{ mM}$ ,  $\text{SO}_4^{2-} = 40.1 \text{ mM}$ ,  $\text{HCO}_3^-/\text{CO}_3^{2-} = 1.41$ ,  $\text{F}^- = 95.8 \text{ }\mu\text{M}$ ,  $\text{NOM} = 8.7 \text{ mg/L}$ ,  $N = 3$ .

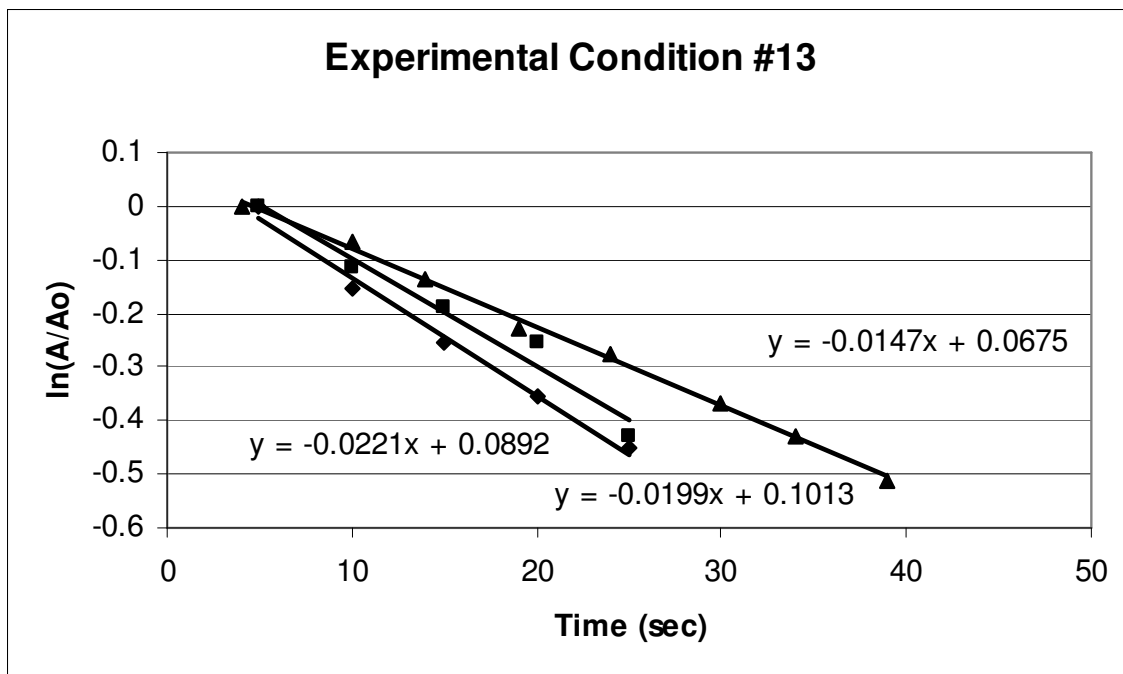

**Supp. Figure 4.13** Experimental condition #13.  $\text{Cl}^- = 316.4 \text{ mM}$ ,  $\text{SO}_4^{2-} = 16.4 \text{ mM}$ ,  $\text{HCO}_3^-/\text{CO}_3^{2-} = 3.14$ ,  $\text{F}^- = 95.8 \text{ }\mu\text{M}$ ,  $\text{NOM} = 8.7 \text{ mg/L}$ ,  $N = 3$ .

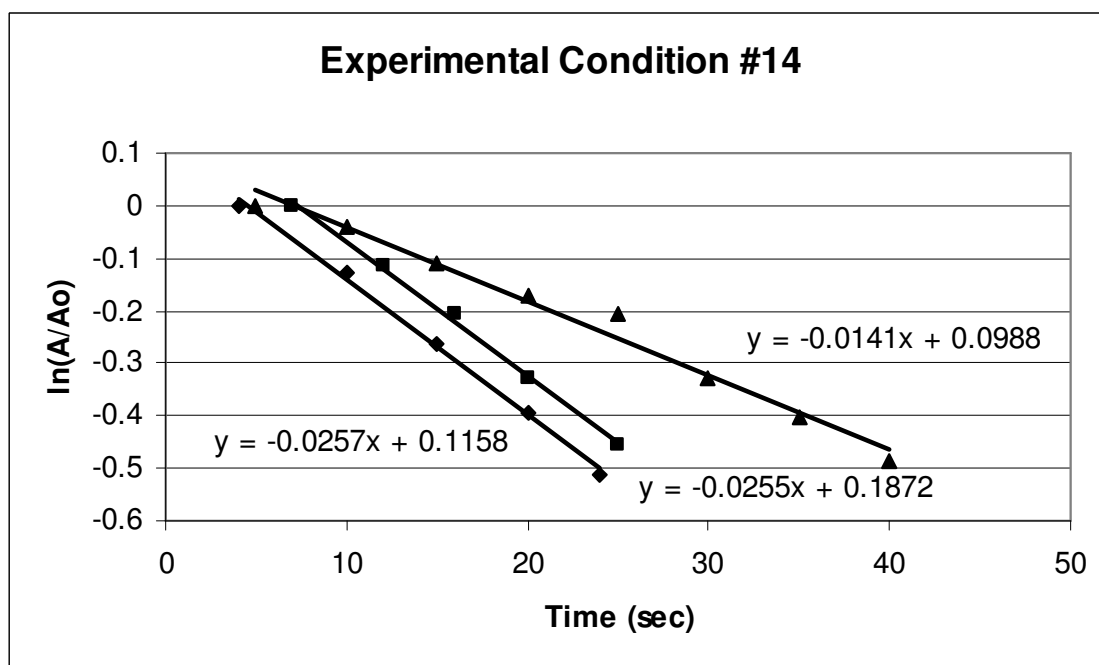

**Supp. Figure 4.14** Experimental condition #14.  $\text{Cl}^- = 777.5 \text{ mM}$ ,  $\text{SO}_4^{2-} = 16.4 \text{ mM}$ ,  $\text{HCO}_3^-/\text{CO}_3^{2-} = 3.14$ ,  $\text{F}^- = 95.8 \text{ }\mu\text{M}$ ,  $\text{NOM} = 8.7 \text{ mg/L}$ ,  $N = 3$ .

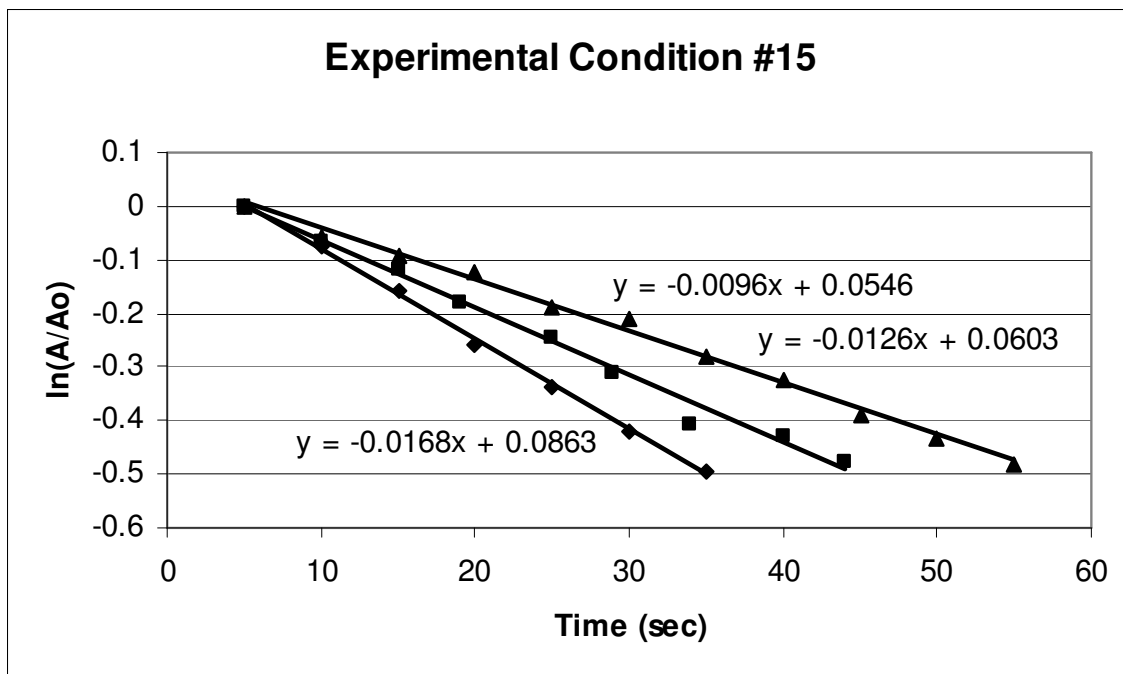

**Supp. Figure 4.15** Experimental condition #15.  $\text{Cl}^- = 316.4 \text{ mM}$ ,  $\text{SO}_4^{2-} = 40.1 \text{ mM}$ ,  $\text{HCO}_3^-/\text{CO}_3^{2-} = 3.14$ ,  $\text{F}^- = 95.8 \text{ }\mu\text{M}$ ,  $\text{NOM} = 8.7 \text{ mg/L}$ ,  $N = 3$ .

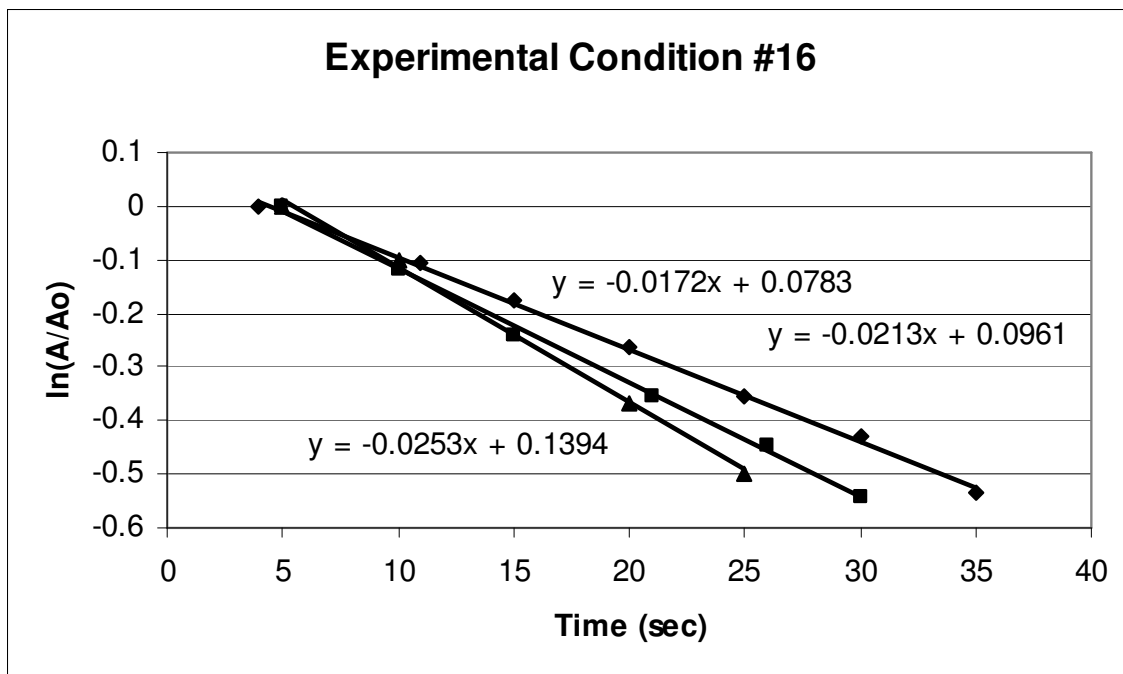

**Supp. Figure 4.16** Experimental condition #16.  $\text{Cl}^- = 777.5 \text{ mM}$ ,  $\text{SO}_4^{2-} = 40.1 \text{ mM}$ ,  $\text{HCO}_3^-/\text{CO}_3^{2-} = 3.14$ ,  $\text{F}^- = 98.5 \text{ }\mu\text{M}$ ,  $\text{NOM} = 8.7 \text{ mg/L}$ ,  $N = 3$ .



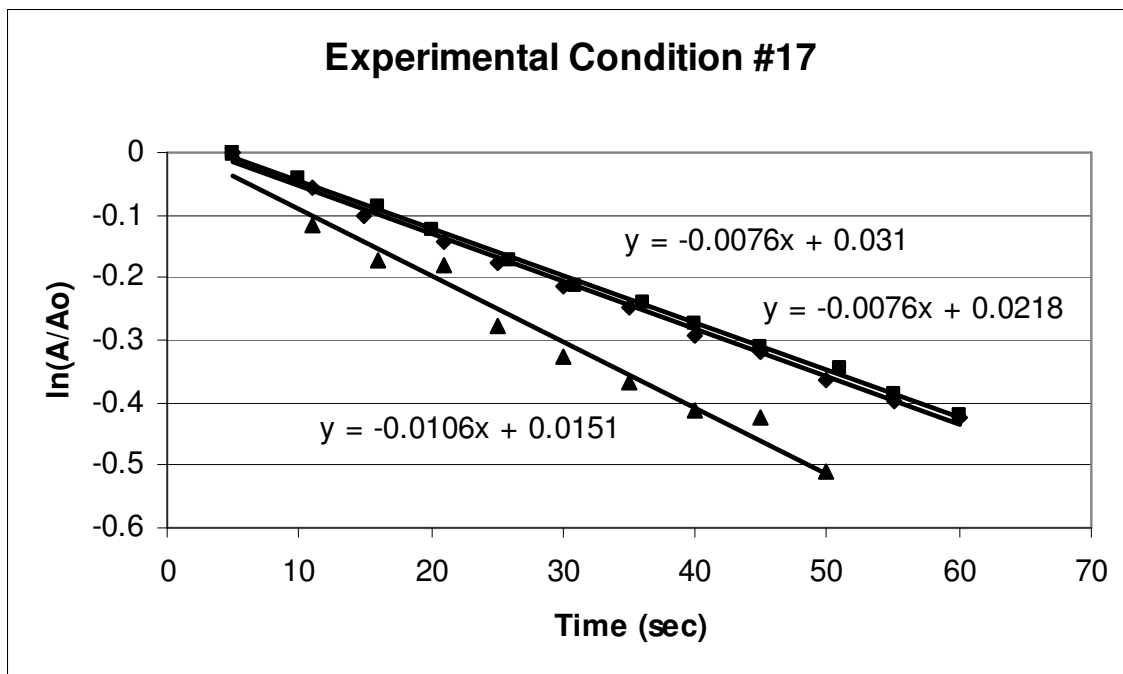

**Supp. Figure 4.17** Experimental condition #17.  $\text{Cl}^- = 316.4 \text{ mM}$ ,  $\text{SO}_4^{2-} = 16.4 \text{ mM}$ ,  $\text{HCO}_3^-/\text{CO}_3^{2-} = 1.41$ ,  $\text{F}^- = 38.9 \text{ }\mu\text{M}$ ,  $\text{NOM} = 21.3 \text{ mg/L}$ ,  $N = 3$ .

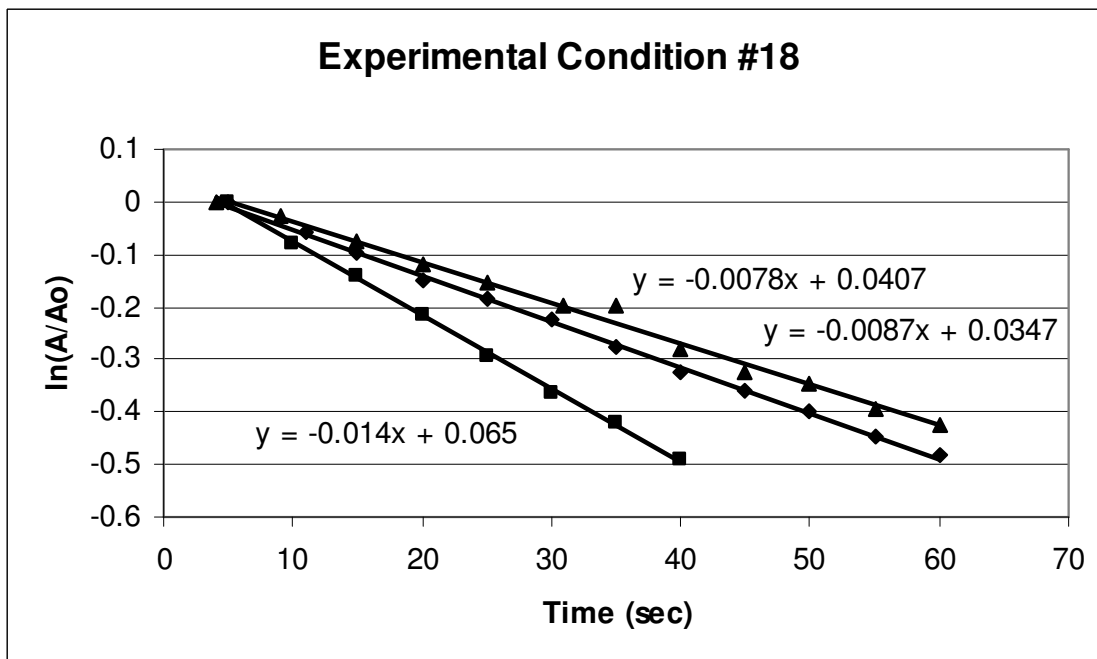

**Supp. Figure 4.18** Experimental condition #18.  $\text{Cl}^- = 777.5 \text{ mM}$ ,  $\text{SO}_4^{2-} = 16.4 \text{ mM}$ ,  $\text{HCO}_3^-/\text{CO}_3^{2-} = 1.41$ ,  $F = 38.9 \text{ }\mu\text{M}$ ,  $\text{NOM} = 21.3 \text{ mg/L}$ ,  $N = 3$ .

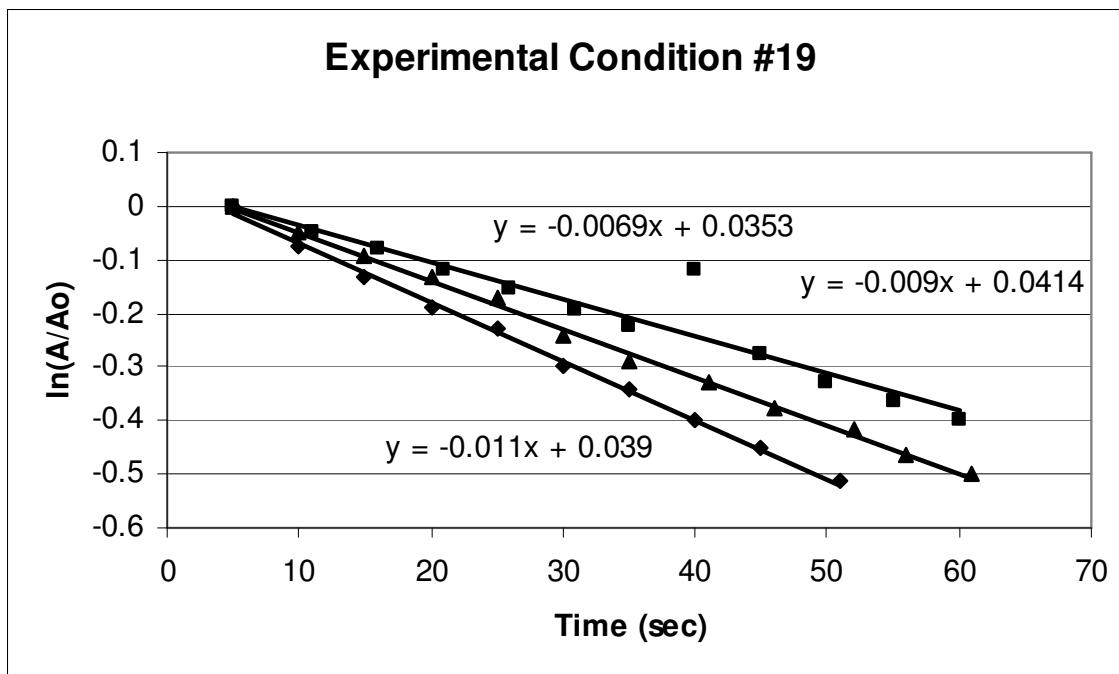

**Supp. Figure 4.19** Experimental condition #19.  $\text{Cl}^- = 316.4 \text{ mM}$ ,  $\text{SO}_4^{2-} = 40.1 \text{ mM}$ ,  $\text{HCO}_3^-/\text{CO}_3^{2-} = 1.41$ ,  $\text{F}^- = 38.9 \text{ }\mu\text{M}$ ,  $\text{NOM} = 21.3 \text{ mg/L}$ ,  $N = 3$ .

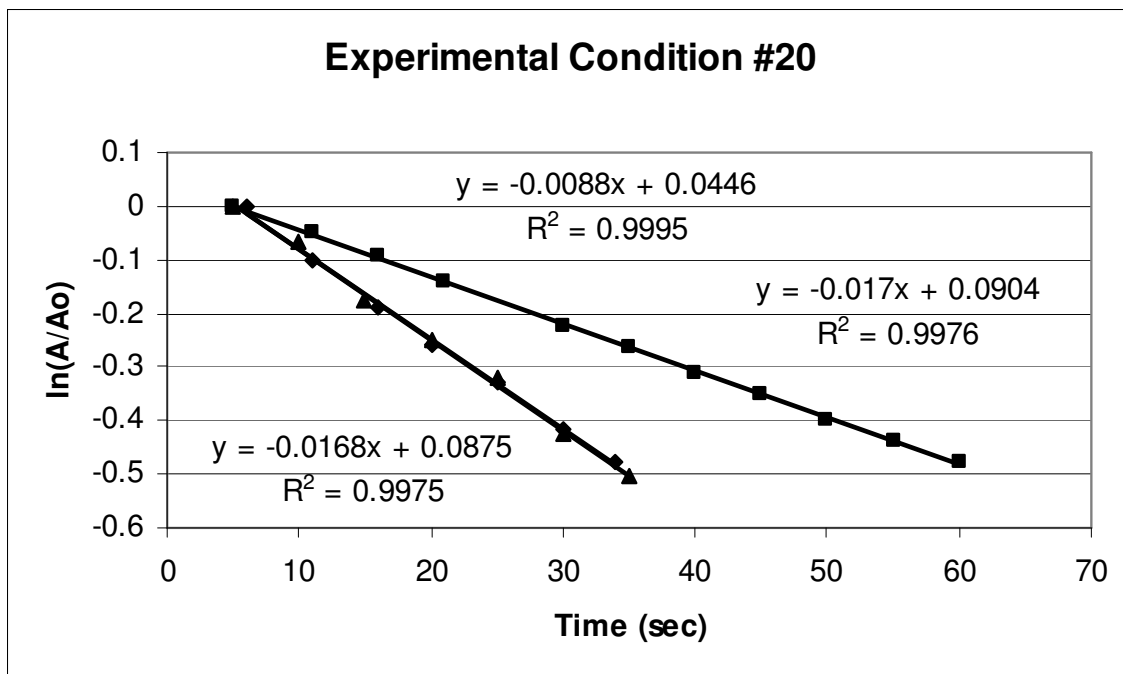

**Supp. Figure 4.20** Experimental condition #20.  $\text{Cl}^- = 777.5 \text{ mM}$ ,  $\text{SO}_4^{2-} = 40.1 \text{ mM}$ ,  $\text{HCO}_3^-/\text{CO}_3^{2-} = 1.41$ ,  $\text{F}^- = 38.9 \text{ }\mu\text{M}$ ,  $\text{NOM} = 21.3 \text{ mg/L}$ ,  $N = 3$ .

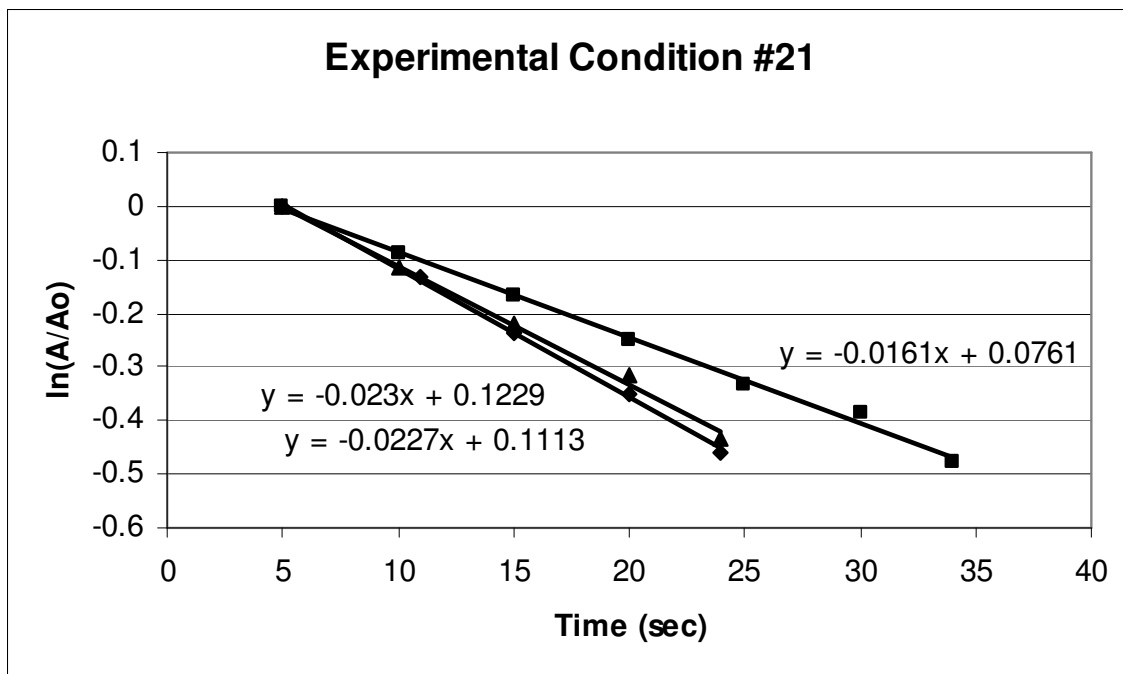

**Supp. Figure 4.21** Experimental condition #21.  $\text{Cl}^- = 316.4 \text{ mM}$ ,  $\text{SO}_4^{2-} = 16.4 \text{ mM}$ ,  $\text{HCO}_3^-/\text{CO}_3^{2-} = 3.14$ ,  $\text{F}^- = 38.9 \text{ }\mu\text{M}$ ,  $\text{NOM} = 21.3 \text{ mg/L}$ ,  $N = 3$ .

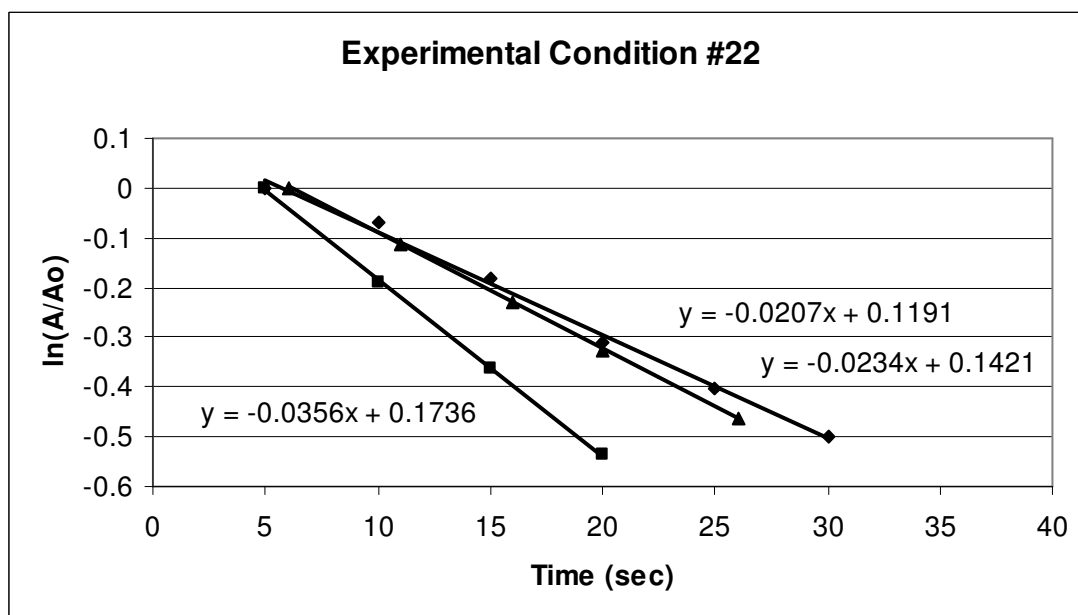

**Supp. Figure 4.22** Experimental condition #22.  $\text{Cl}^- = 777.5 \text{ mM}$ ,  $\text{SO}_4^{2-} = 16.4 \text{ mM}$ ,  $\text{HCO}_3^-/\text{CO}_3^{2-} = 3.14$ ,  $\text{F}^- = 38.9 \text{ }\mu\text{M}$ ,  $\text{NOM} = 21.3 \text{ mg/L}$ ,  $N = 3$ .

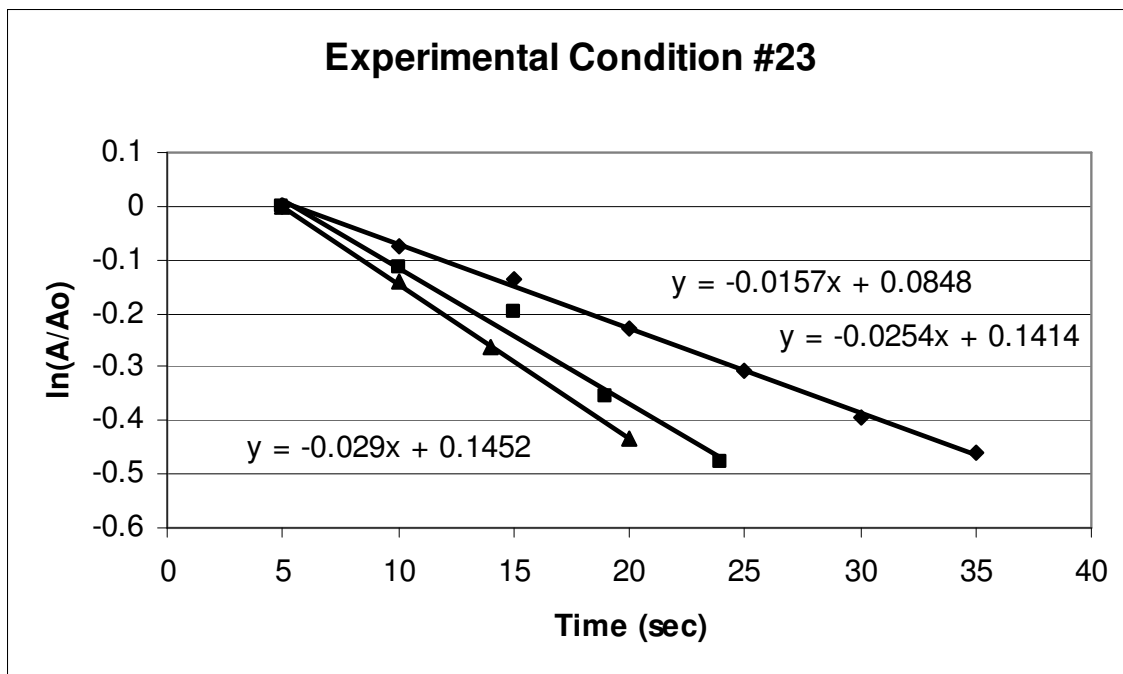

**Supp. Figure 4.23** Experimental condition #23.  $\text{Cl}^- = 316.4 \text{ mM}$ ,  $\text{SO}_4^{2-} = 40.1 \text{ mM}$ ,  $\text{HCO}_3^-/\text{CO}_3^{2-} = 3.14$ ,  $\text{F}^- = 38.9 \text{ }\mu\text{M}$ ,  $\text{NOM} = 21.3 \text{ mg/L}$ ,  $N = 3$ .

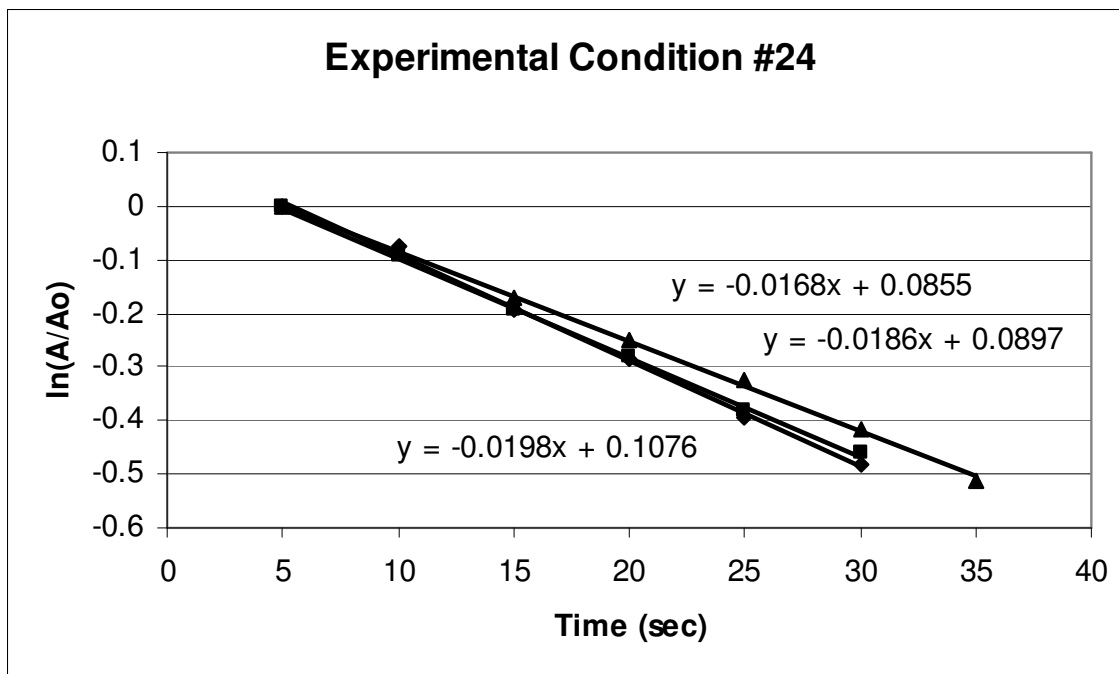

**Supp. Figure 4.24** Experimental condition #24.  $\text{Cl}^- = 777.5 \text{ mM}$ ,  $\text{SO}_4^{2-} = 40.1 \text{ mM}$ ,  $\text{HCO}_3^-/\text{CO}_3^{2-} = 3.14$ ,  $\text{F}^- = 38.9 \text{ }\mu\text{M}$ ,  $\text{NOM} = 21.3 \text{ mg/L}$ ,  $N = 3$ .



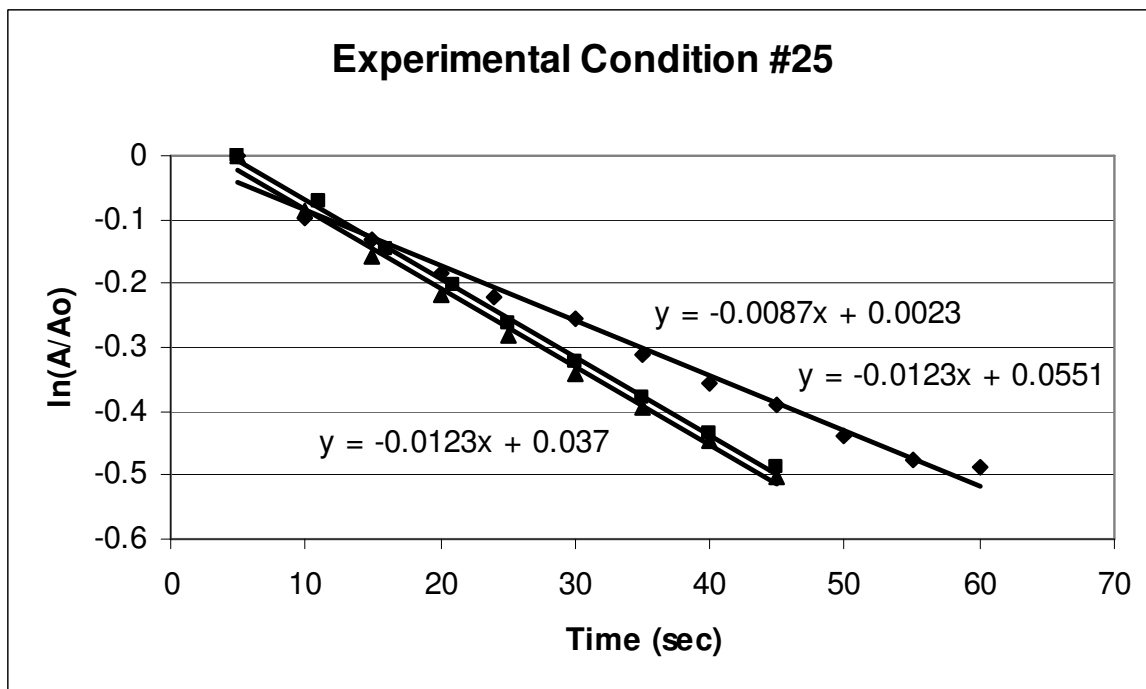

**Supp. Figure 4.25** Experimental condition #25.  $\text{Cl}^- = 316.4 \text{ mM}$ ,  $\text{SO}_4^{2-} = 16.4 \text{ mM}$ ,  $\text{HCO}_3^-/\text{CO}_3^{2-} = 1.41$ ,  $\text{F}^- = 95.8 \text{ }\mu\text{M}$ ,  $\text{NOM} = 21.3 \text{ mg/L}$ ,  $N = 3$ .

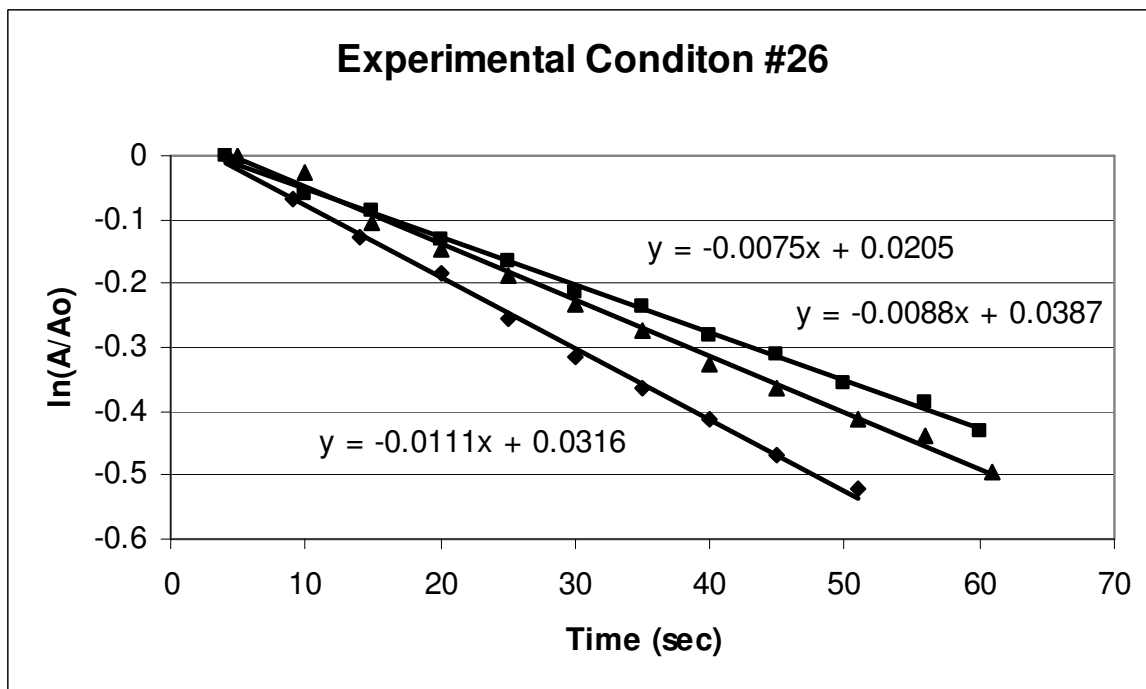

**Supp. Figure 4.26** Experimental condition #26.  $\text{Cl}^- = 777.5 \text{ mM}$ ,  $\text{SO}_4^{2-} = 16.4 \text{ mM}$ ,  $\text{HCO}_3^-/\text{CO}_3^{2-} = 1.41$ ,  $\text{F}^- = 95.8 \text{ }\mu\text{M}$ ,  $\text{NOM} = 21.3 \text{ mg/L}$ ,  $N = 3$ .

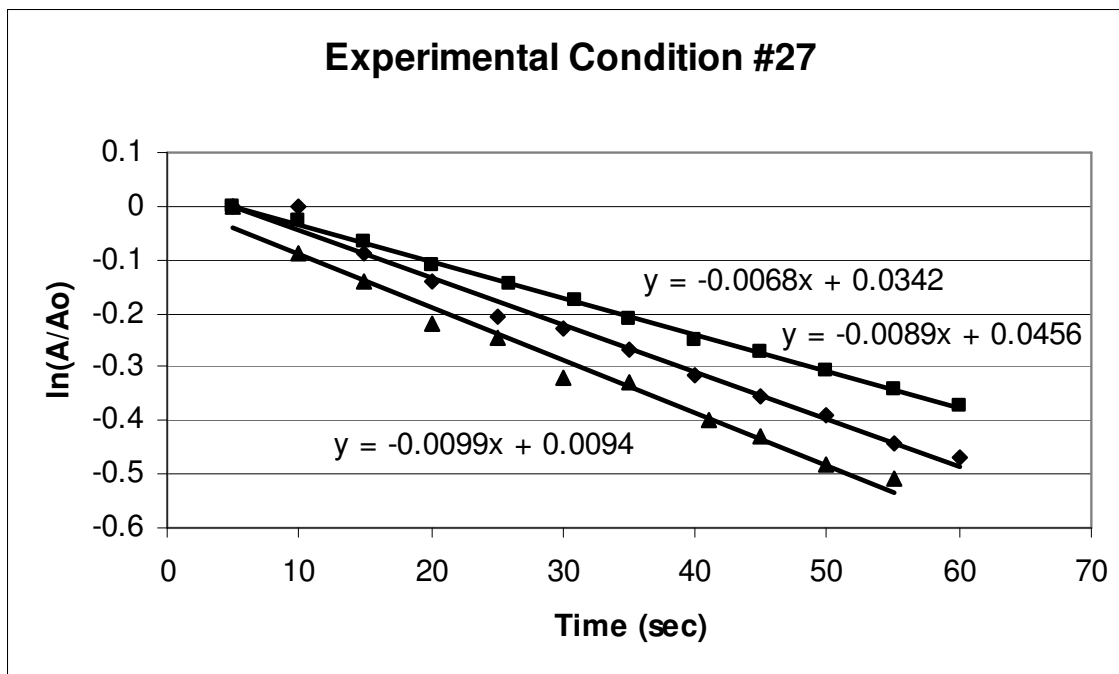

**Supp. Figure 4.27** Experimental condition #27.  $\text{Cl}^- = 316.4 \text{ mM}$ ,  $\text{SO}_4^{2-} = 40.1 \text{ mM}$ ,  $\text{HCO}_3^-/\text{CO}_3^{2-} = 1.41$ ,  $\text{F}^- = 95.8 \text{ }\mu\text{M}$ ,  $\text{NOM} = 21.3 \text{ mg/L}$ ,  $N = 3$ .

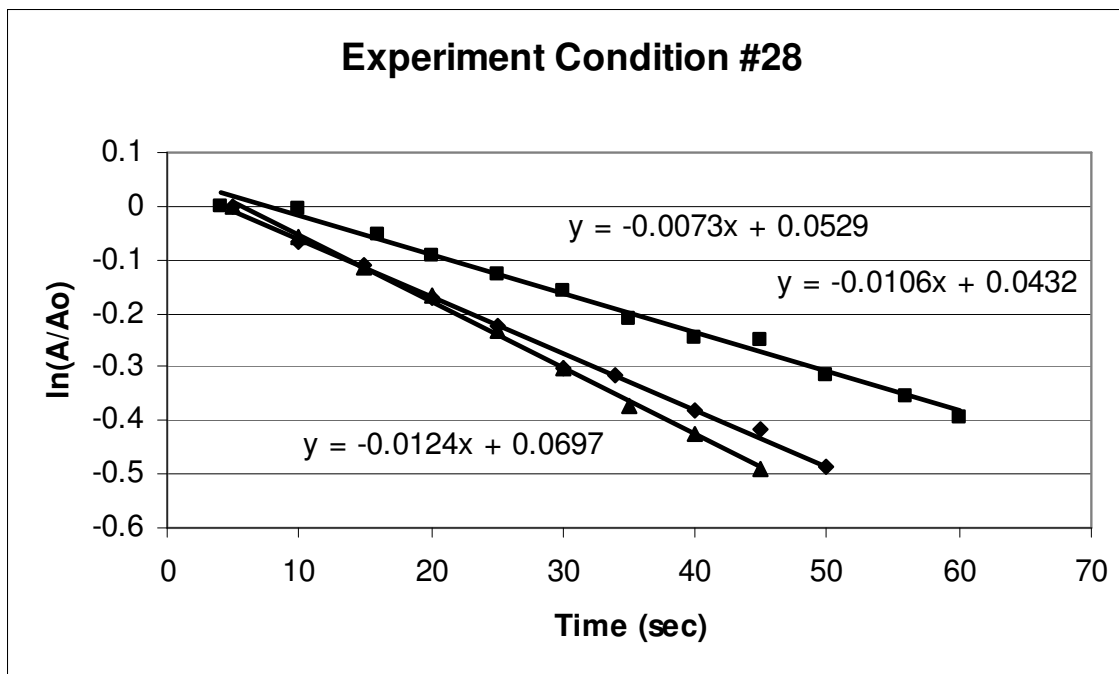

**Supp. Figure 4.28** Experimental condition #28.  $\text{Cl}^- = 777.5 \text{ mM}$ ,  $\text{SO}_4^{2-} = 40.1 \text{ mM}$ ,  $\text{HCO}_3^-/\text{CO}_3^{2-} = 1.41$ ,  $\text{F}^- = 95.8 \text{ }\mu\text{M}$ ,  $\text{NOM} = 21.3 \text{ mg/L}$ ,  $N = 3$ .

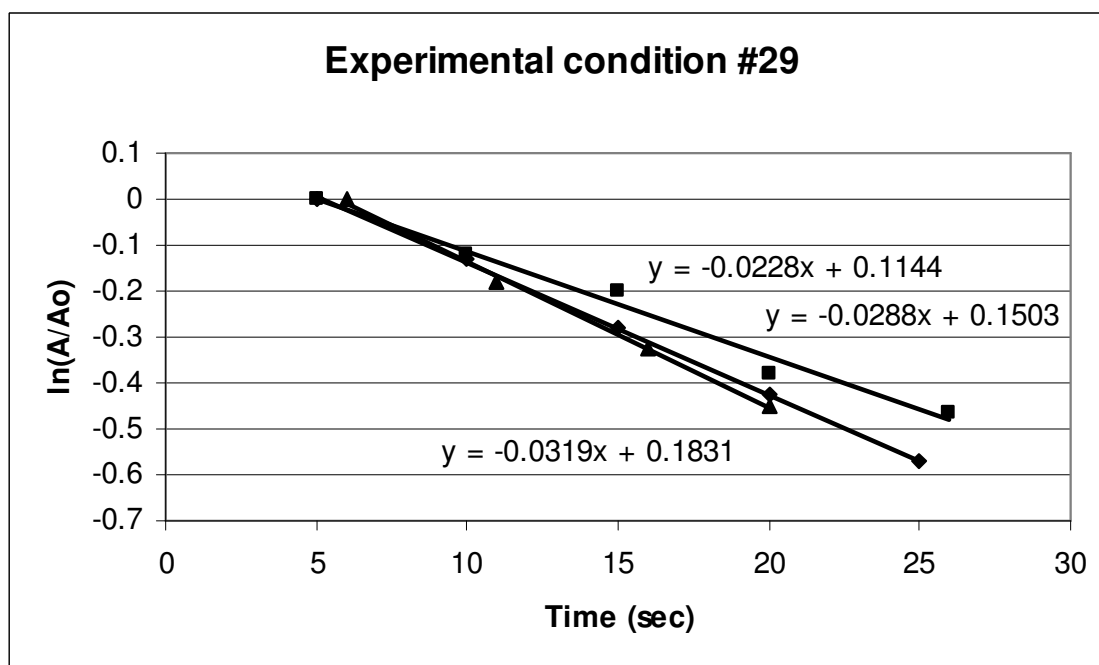

**Supp. Figure 4.29** Experimental condition #29.  $\text{Cl}^- = 316.4 \text{ mM}$ ,  $\text{SO}_4^{2-} = 16.4 \text{ mM}$ ,  $\text{HCO}_3^-/\text{CO}_3^{2-} = 3.14$ ,  $\text{F}^- = 95.8 \text{ }\mu\text{M}$ ,  $\text{NOM} = 21.3 \text{ mg/L}$ ,  $N = 3$ .

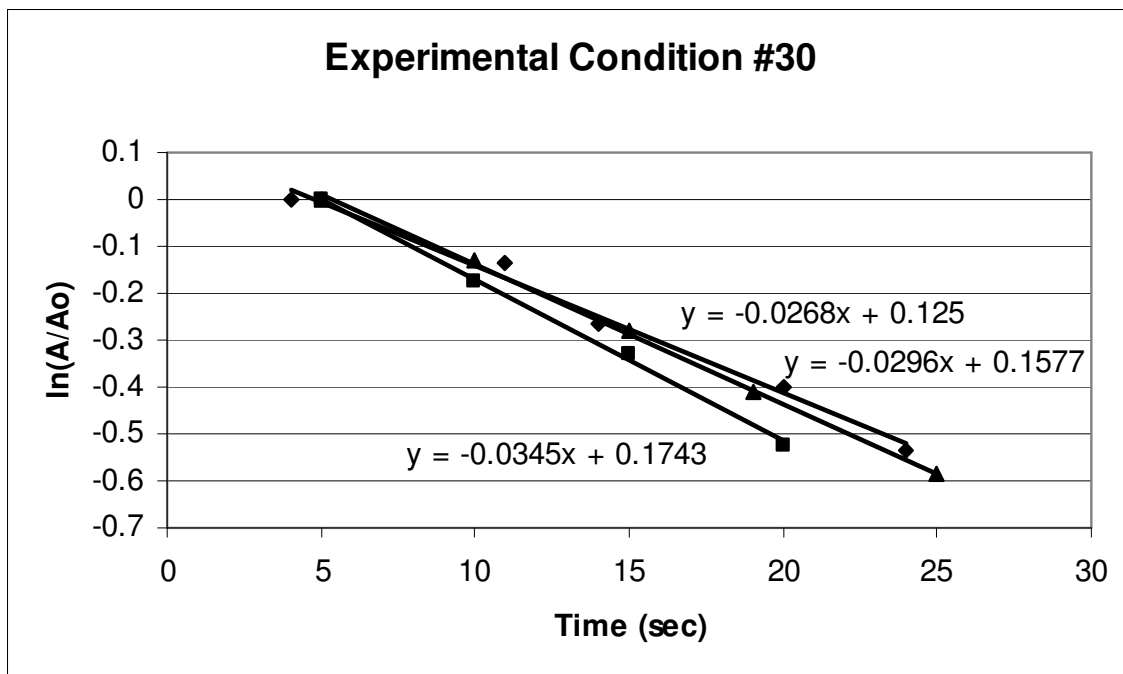

**Supp. Figure 4.30** Experimental condition #30.  $\text{Cl}^- = 777.5 \text{ mM}$ ,  $\text{SO}_4^{2-} = 16.4 \text{ mM}$ ,  $\text{HCO}_3^-/\text{CO}_3^{2-} = 3.14$ ,  $\text{F}^- = 95.8 \text{ }\mu\text{M}$ ,  $\text{NOM} = 21.3 \text{ mg/L}$ ,  $N = 3$ .

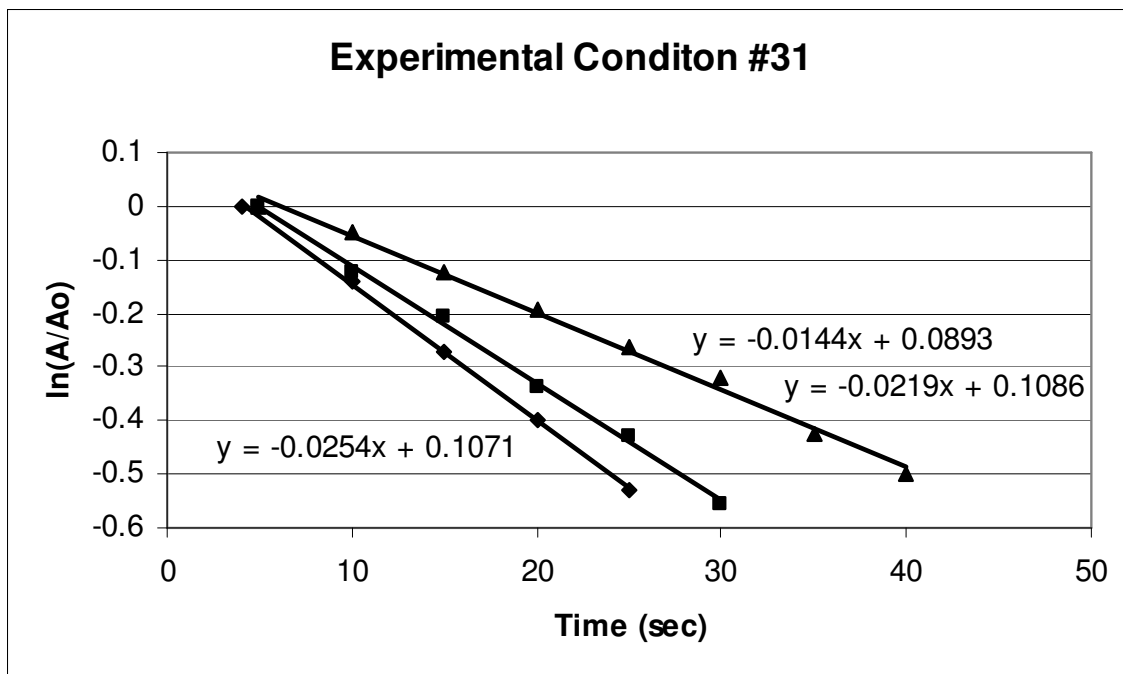

**Supp. Figure 4.31** Experimental condition #31.  $\text{Cl}^- = 316.4 \text{ mM}$ ,  $\text{SO}_4^{2-} = 40.1 \text{ mM}$ ,  $\text{HCO}_3^-/\text{CO}_3^{2-} = 3.14$ ,  $\text{F}^- = 95.8 \text{ }\mu\text{M}$ ,  $\text{NOM} = 21.3 \text{ mg/L}$ ,  $N = 3$ .

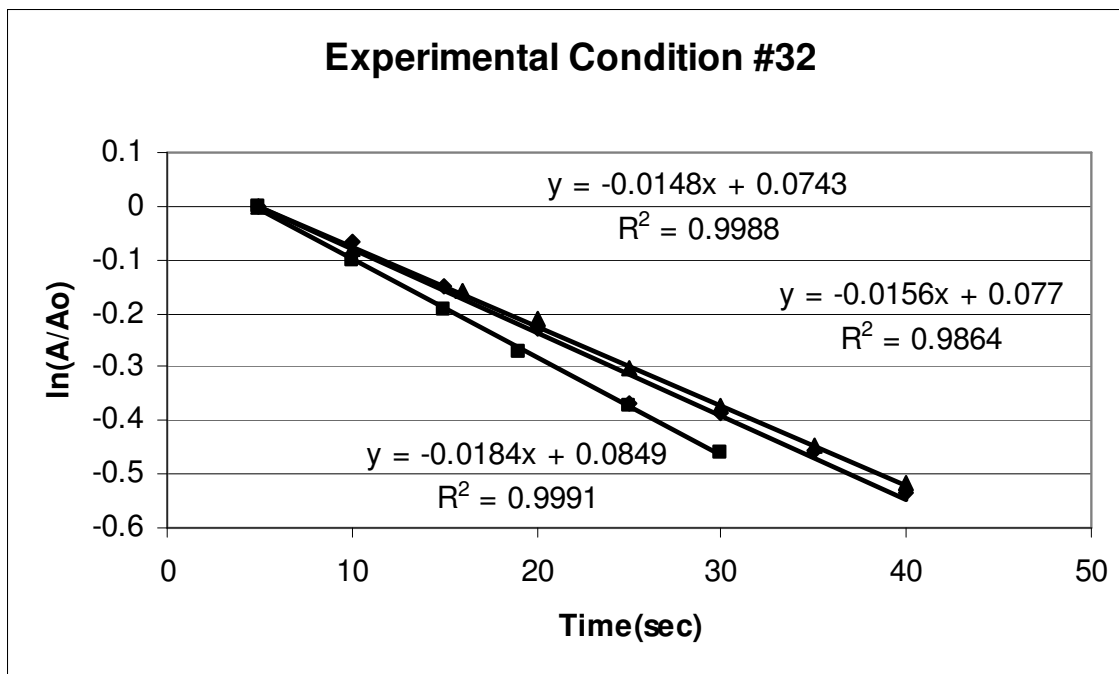

**Supp. Figure 4.32** Experimental condition #32.  $\text{Cl}^- = 777.5 \text{ mM}$ ,  $\text{SO}_4^{2-} = 40.1 \text{ mM}$ ,  $\text{HCO}_3^-/\text{CO}_3^{2-} = 3.14$ ,  $\text{F}^- = 95.8 \text{ }\mu\text{M}$ ,  $\text{NOM} = 21.3 \text{ mg/L}$ ,  $N = 3$ .



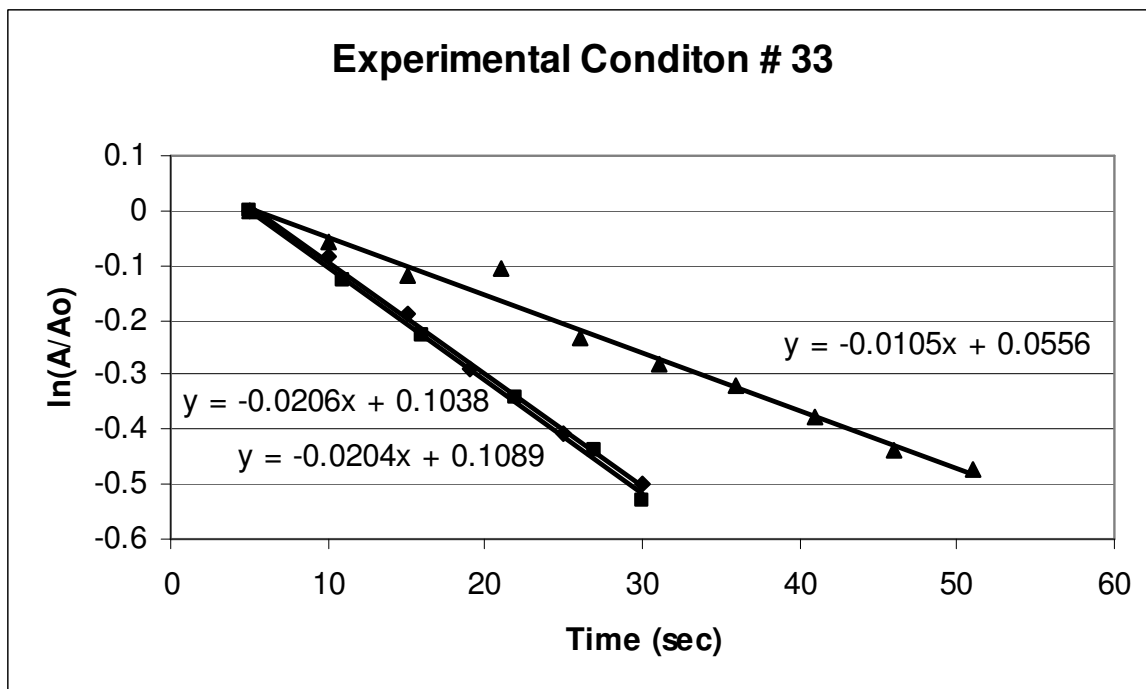

**Supp. Figure 4.33** Experimental condition #33.  $\text{Cl}^- = 0 \text{ mM}$ ,  $\text{SO}_4^{2-} = 28.2 \text{ mM}$ ,  $\text{HCO}_3^- / \text{CO}_3^{2-} = 2.28$ ,  $\text{F}^- = 67.4 \text{ } \mu\text{M}$ ,  $\text{NOM} = 15 \text{ mg/L}$ ,  $N = 3$ .

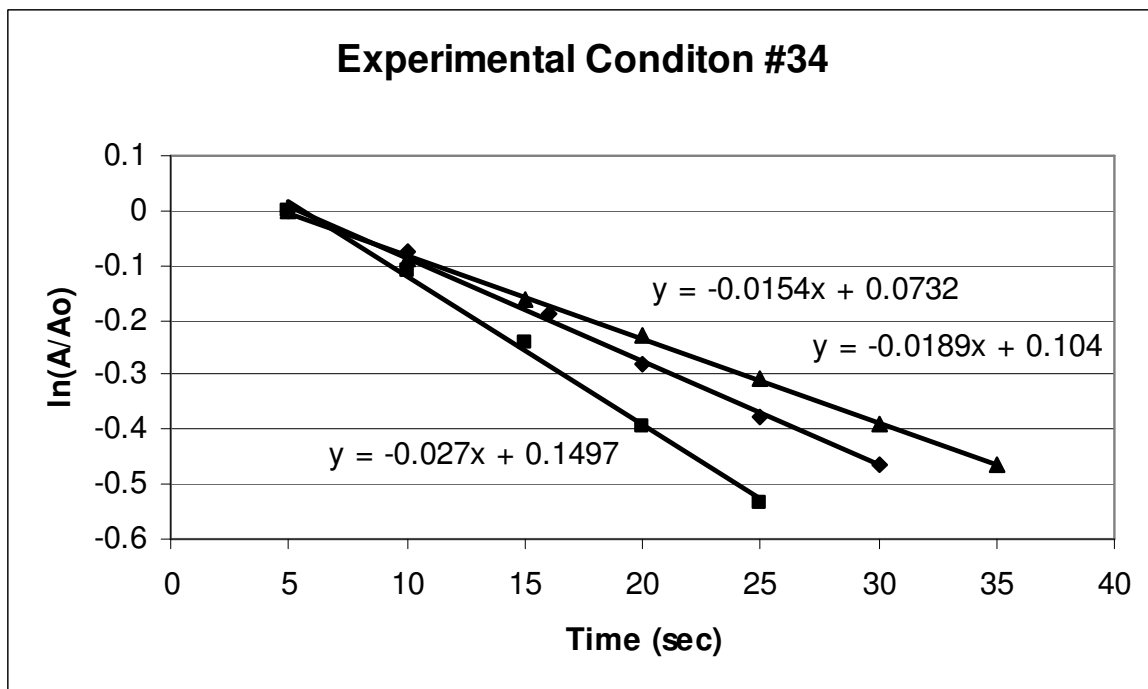

**Supp. Figure 4.34** Experimental condition #34.  $\text{Cl}^- = 1091.8 \text{ mM}$ ,  $\text{SO}_4^{2-} = 28.2 \text{ mM}$ ,  $\text{HCO}_3^-/\text{CO}_3^{2-} = 2.28$ ,  $\text{F}^- = 67.4 \text{ }\mu\text{M}$ ,  $\text{NOM} = 15 \text{ mg/L}$ ,  $N = 3$ .

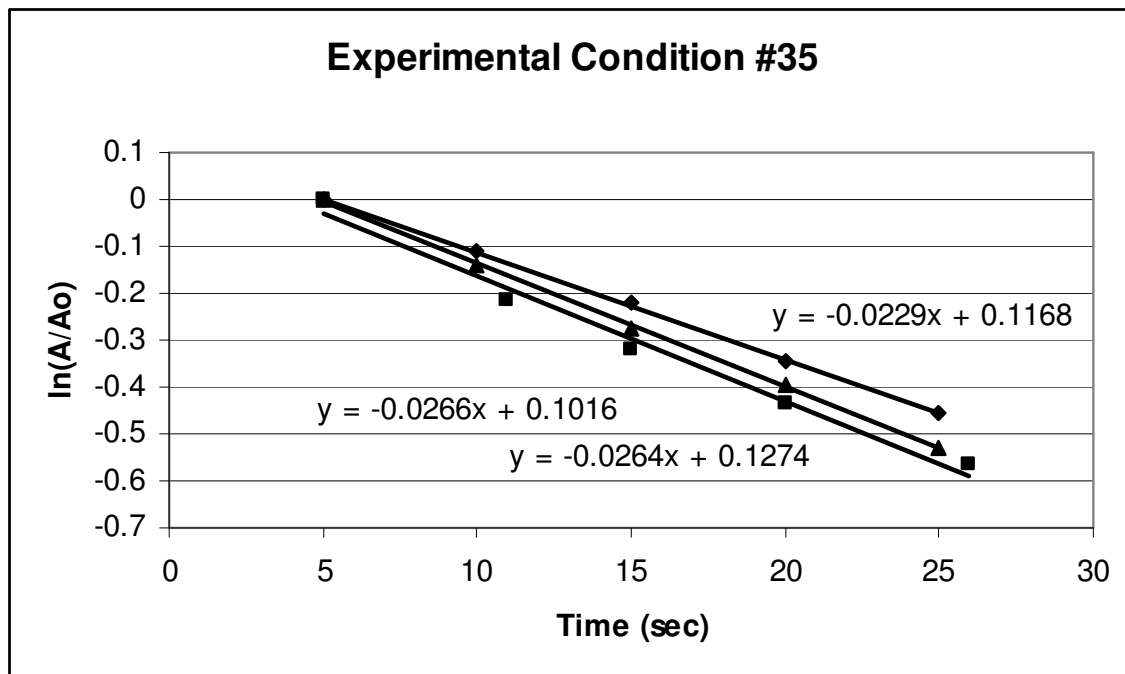

**Supp. Figure 4.35** Experimental condition #35.  $\text{Cl}^- = 545.9 \text{ mM}$ ,  $\text{SO}_4^{2-} = 0 \text{ mM}$ ,  $\text{HCO}_3^- / \text{CO}_3^{2-} = 2.28$ ,  $\text{F}^- = 67.4 \text{ }\mu\text{M}$ ,  $\text{NOM} = 15 \text{ mg/L}$ ,  $N = 3$ .

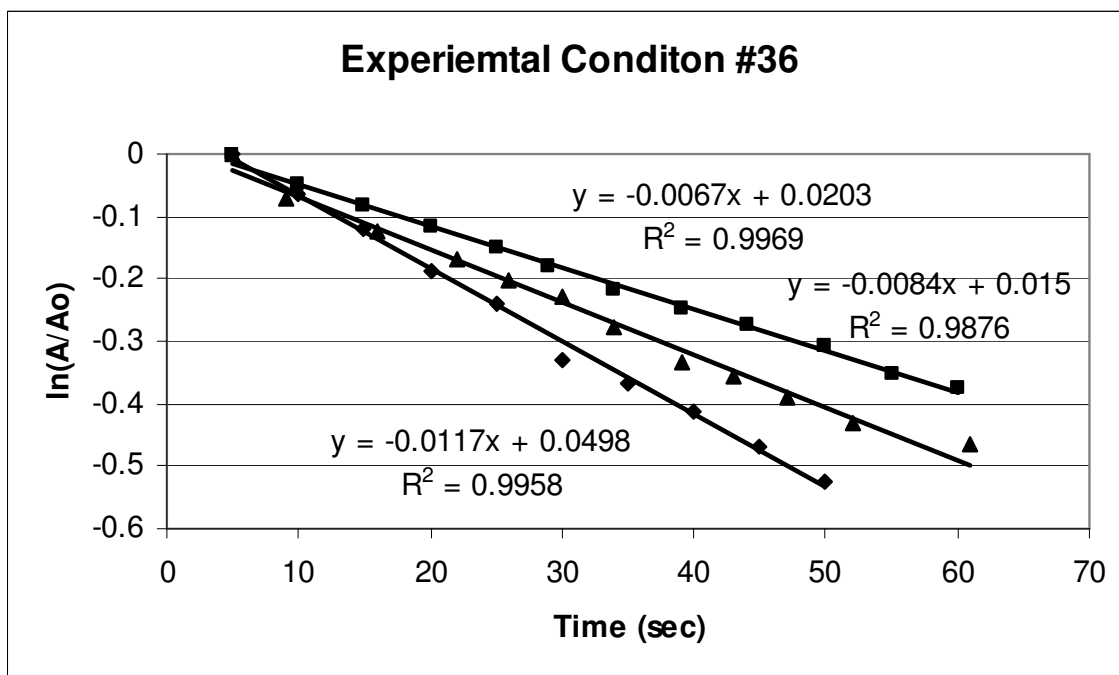

**Supp. Figure 4.36** Experimental condition #36.  $\text{Cl}^- = 545.9 \text{ mM}$ ,  $\text{SO}_4^{2-} = 56.4 \text{ mM}$ ,  $\text{HCO}_3^-/\text{CO}_3^{2-} = 2.28$ ,  $\text{F}^- = 67.4 \text{ }\mu\text{M}$ ,  $\text{NOM} = 15 \text{ mg/L}$ ,  $N = 3$ .

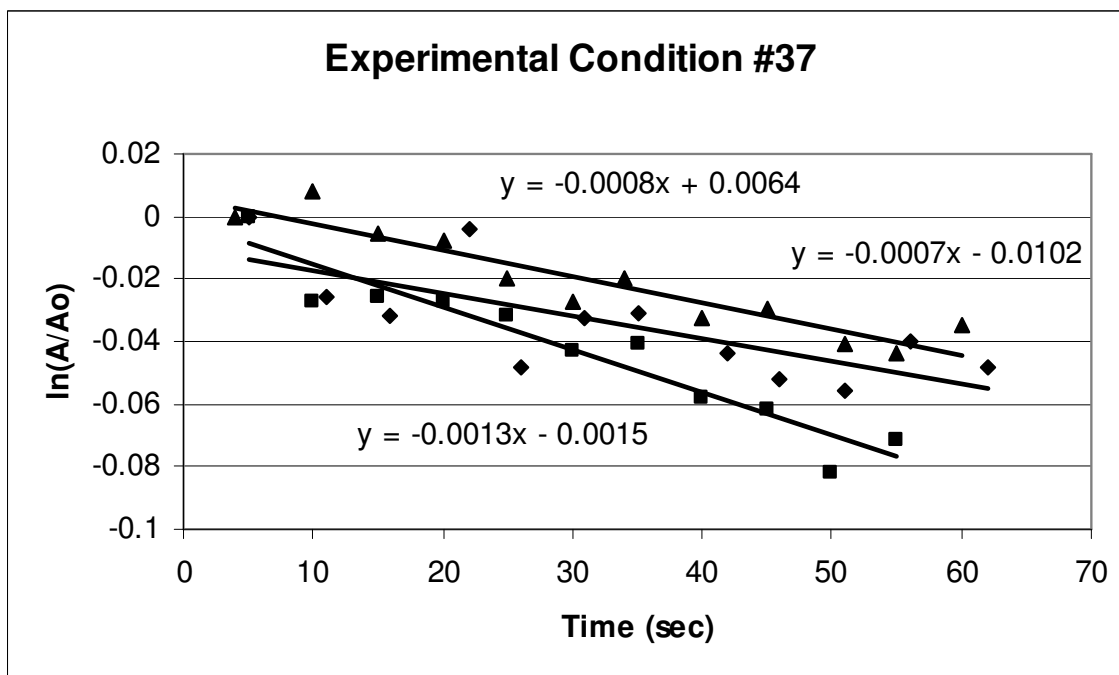

**Supp. Figure 4.37** Experimental condition #37.  $\text{Cl}^- = 545.9 \text{ mM}$ ,  $\text{SO}_4^{2-} = 28.2 \text{ mM}$ ,  $\text{HCO}_3^-/\text{CO}_3^{2-} = 0.21$ ,  $\text{F}^- = 67.4 \text{ }\mu\text{M}$ ,  $\text{NOM} = 15 \text{ mg/L}$ ,  $N = 3$ .

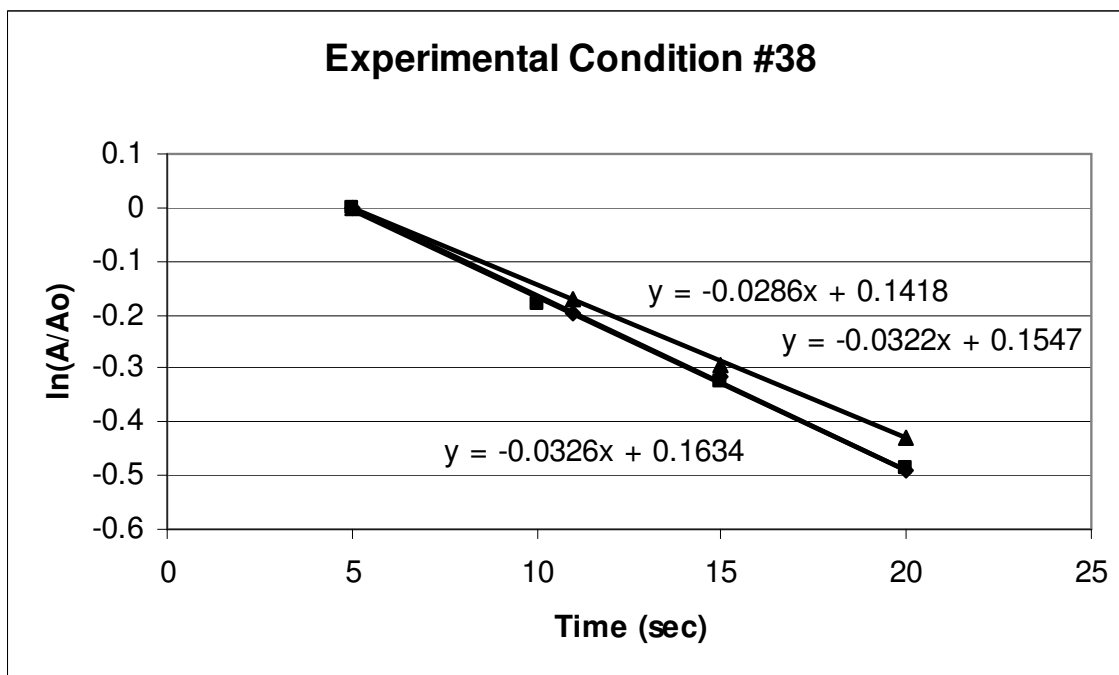

**Supp. Figure 4.38** Experimental condition #38.  $\text{Cl}^- = 545.9 \text{ mM}$ ,  $\text{SO}_4^{2-} = 28.2 \text{ mM}$ ,  $\text{HCO}_3^-/\text{CO}_3^{2-} = 4.34$ ,  $\text{F}^- = 67.4 \text{ }\mu\text{M}$ ,  $\text{NOM} = 15 \text{ mg/L}$ ,  $N = 3$ .

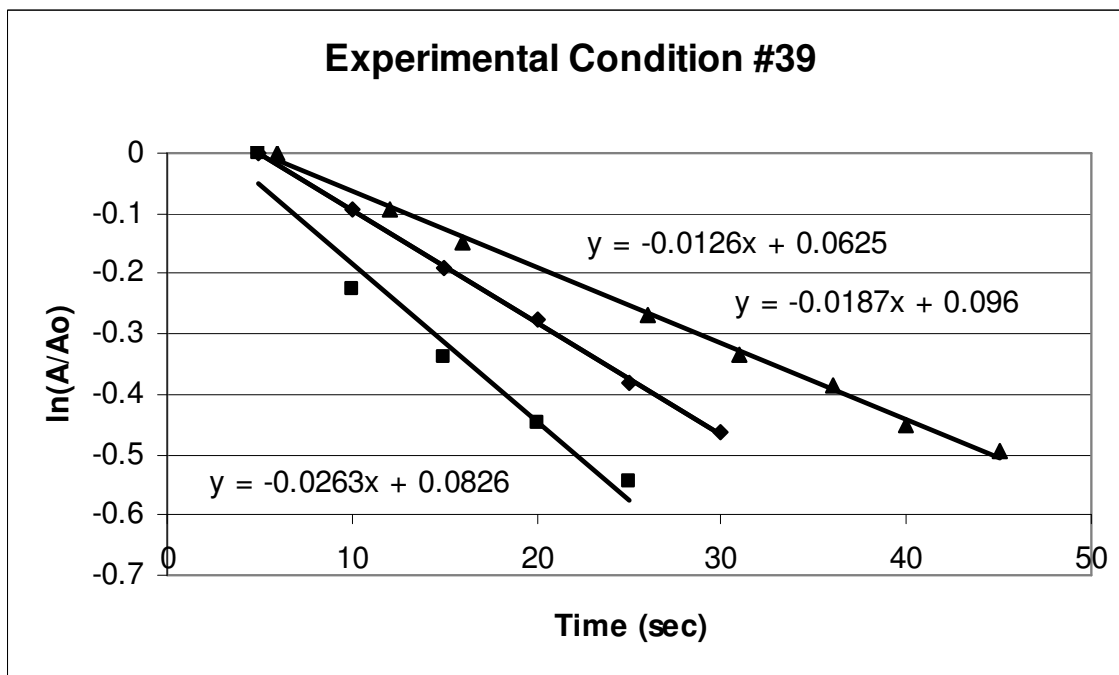

**Supp. Figure 4.39** Experimental condition #39.  $\text{Cl}^- = 545.9 \text{ mM}$ ,  $\text{SO}_4^{2-} = 28.2 \text{ mM}$ ,  $\text{HCO}_3^-/\text{CO}_3^{2-} = 2.28$ ,  $\text{F}^- = 0 \text{ }\mu\text{M}$ ,  $\text{NOM} = 15 \text{ mg/L}$ ,  $N = 3$ .

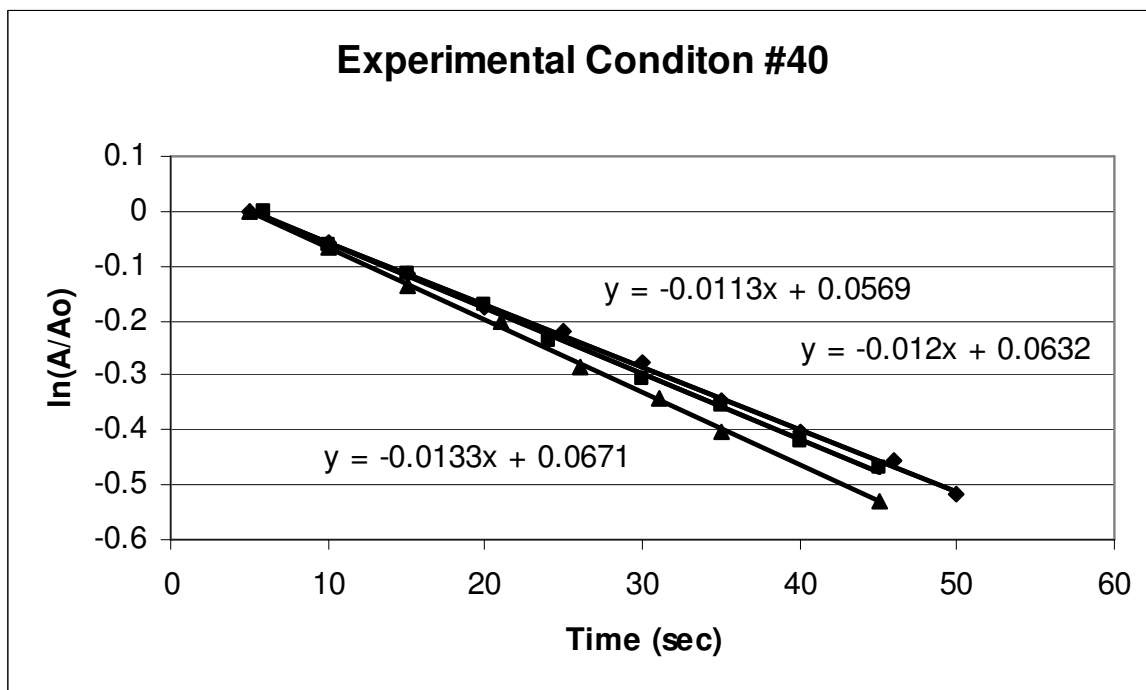

**Supp. Figure 4.40** Experimental condition #40.  $\text{Cl}^- = 545.9 \text{ mM}$ ,  $\text{SO}_4^{2-} = 28.2 \text{ mM}$ ,  $\text{HCO}_3^-/\text{CO}_3^{2-} = 2.28$ ,  $\text{F}^- = 134.8 \text{ }\mu\text{M}$ ,  $\text{NOM} = 15 \text{ mg/L}$ ,  $N = 3$ .



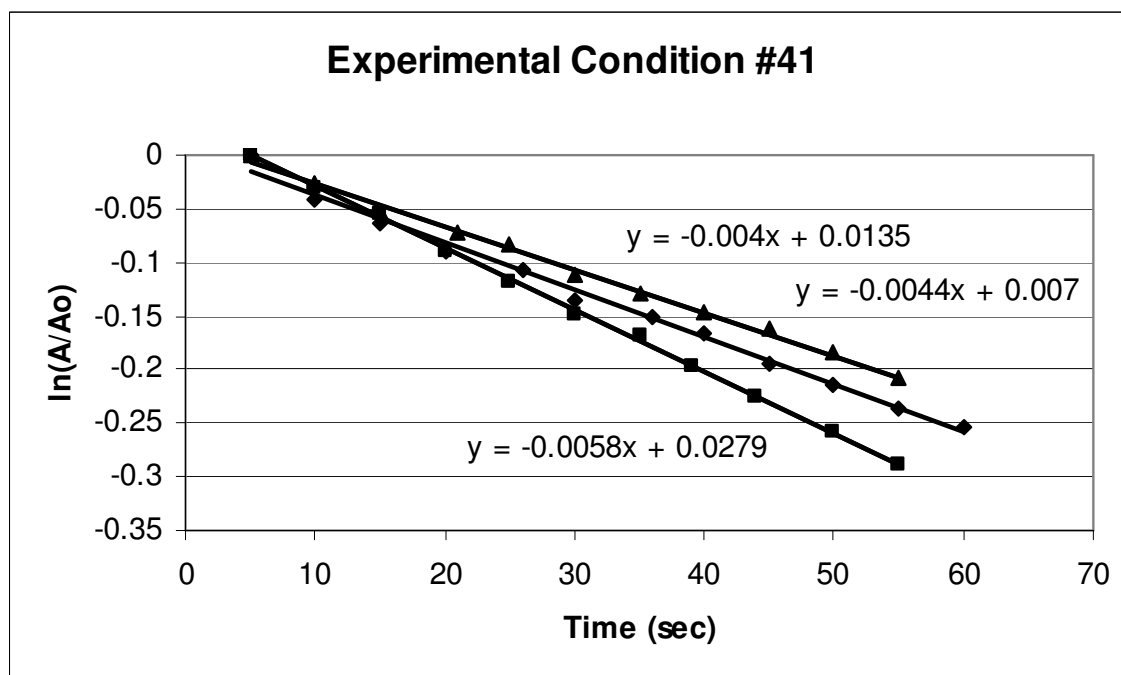

**Supp. Figure 4.41** Experimental condition #41.  $\text{Cl}^- = 545.9 \text{ mM}$ ,  $\text{SO}_4^{2-} = 28.2 \text{ mM}$ ,  $\text{HCO}_3^-/\text{CO}_3^{2-} = 2.28$ ,  $\text{F}^- = 67.4 \text{ }\mu\text{M}$ ,  $\text{NOM} = 0 \text{ mg/L}$ ,  $N = 3$ .

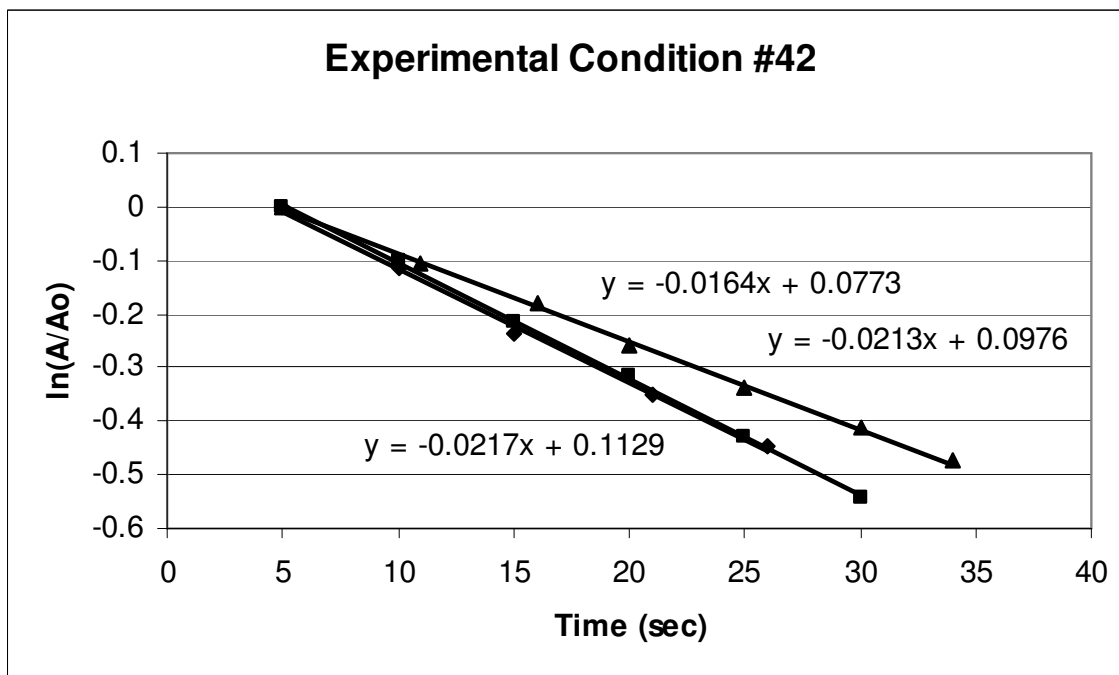

**Supp. Figure 4.42** Experimental condition #42.  $\text{Cl}^- = 545.9 \text{ mM}$ ,  $\text{SO}_4^{2-} = 28.2 \text{ mM}$ ,  $\text{HCO}_3^-/\text{CO}_3^{2-} = 2.28$ ,  $\text{F}^- = 67.4 \text{ }\mu\text{M}$ ,  $\text{NOM} = 30 \text{ mg/L}$ ,  $N = 3$ .

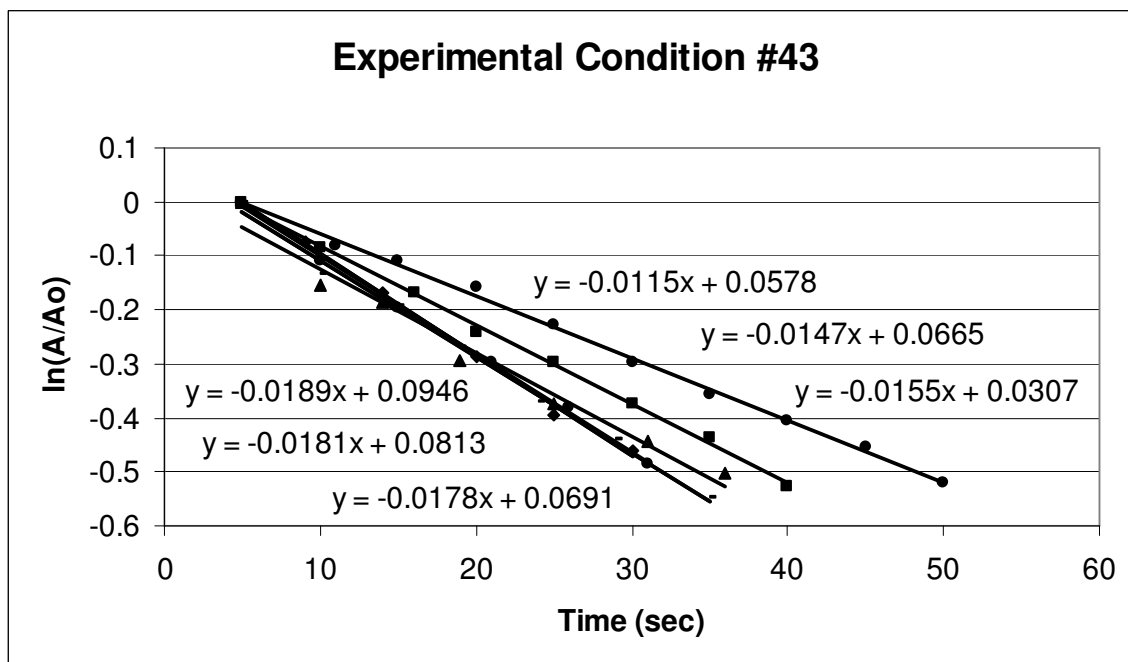

**Supp. Figure 4.43** Experimental condition #43.  $\text{Cl}^- = 545.9 \text{ mM}$ ,  $\text{SO}_4^{2-} = 28.2 \text{ mM}$ ,  $\text{HCO}_3^-/\text{CO}_3^{2-} = 2.28$ ,  $\text{F}^- = 67.4 \text{ }\mu\text{M}$ ,  $\text{NOM} = 15 \text{ mg/L}$ ,  $N = 6$ .

**Isolation procedure of Humic and Fulvic acids supplied by the IHSS (Courtesy of the International Humic Substances Society)**

Adapted from: Aiken, G.R. (1985) "Isolation and concentration techniques for aquatic humic substances", in G.R. Aiken, D.M. McKnight, R.L. Wershaw, and P. MacCarthy (Eds.), *Humic substances in soil, sediment and water: geochemistry and isolation*. Wiley-Interscience, New York

1. Filter water with a 0.45  $\mu\text{m}$  silver or polymer membrane filter.
2. Lower pH to 2.0 with HCl.
3. Pass sample through column of XAD-8 resin to retain humic and fulvic acids. The preparative cleaning of the resin is described by Thurman and Malcolm (1981).
4. Elute HA and FA from the column with 0.1 M NaOH, in the reverse direction. Acidify immediately with HCl to avoid oxidation of humic substances.
5. Re-concentrate on a smaller XAD-8 column. Elute with NaOH and acidify. The eluted DOC should contain more than 500 mg C/L.
6. Adjust pH to 1.0 with HCl. Centrifuge to separate the humic acid (HA) from the fulvic acid (FA) fraction. Wash HA with water until wash is negative to the  $\text{AgNO}_3$  test for chloride. Add sufficient 0.1 M NaOH to dissolve HA and then acidify by passing through a strong acid resin column.
7. Adjust FA fraction to pH 2.0 with NaOH and re-adsorb FA fraction on XAD-8. Wash with one void volume of distilled water to remove the salt.
8. Reverse flow and elute column with 0.1 M NaOH.
9. Immediately pass FA eluate through cation-exchange resin and hydrogen saturate. Pass HA in 0.1 M NaOH through cation-exchange resin and hydrogen saturate. Repeat until  $\text{Na}^+$  is less than 1 mg/L.
10. Freeze dry HA and FA samples.

**REFERENCE**

Thurman, E.M., and R.L. Malcolm. 1981. Preparative isolation of aquatic humic substances. *Environ. Sci. Technol.* **15**:463-466.

### **Location and isolation method information for Suwannee river NOM (Courtesy of the International Humic Substances Society)**

IHSS has recently used reverse osmosis to isolate more than 1000g of natural organic matter (NOM) from the Suwannee River. The sample was collected from the same site that was used originally to collect the standard Suwannee River humic and fulvic acids. The new NOM sample is now available from the IHSS for \$20 per 100mg. The elemental composition of dry Suwannee River NOM is: 48.8 %C; 3.9 %H; 39.7 %O; 1.02 %N; 0.60 %S; 0.02 %P; 7.0 %Ash (Total 101.0%). A brief description of the sampling trip and isolation procedure follows.

From May 1 through May 9, 1999, a group representing the International Humic Substances Society (IHSS) visited the Suwannee River in south Georgia, U.S.A. to collect a new reference sample of natural organic matter (NOM). This reference NOM sample will complement the standard and reference humic and fulvic acids that were previously collected from the Suwannee River. The members of this group included Dr. James Alberts and Dr. Monika Takács of the University of Georgia Marine Institute at Sapelo Island and Dr. Michael Perdue and Ms. Lili Ding of the School of Earth and Atmospheric Sciences at the Georgia Institute of Technology.

The sample was collected at the first dam on the Suwannee River sill, on the southwestern edge of the Okefenokee Swamp near Fargo, GA. The project was authorized by the Board of Directors of IHSS, and access to the sill was granted by the Okefenokee National Wildlife Refuge in Folkston, GA. During the nine-day project, 33 concentrated samples were collected. For each sample, a 120-gallon aliquot of Suwannee River water was prefiltered successively through 1  $\mu\text{m}$  and 0.4  $\mu\text{m}$  polypropylene filters and concentrated to about six gallons using a RealSoft PROS/2S portable reverse osmosis system. After a concentrated sample was obtained, its temperature was maintained at or below the temperature of the river. Overall, 3960 gallons of water (about 14,990 liters) were concentrated to a final volume of 199 gallons (about 753 liters).

Because the chemical composition of the Suwannee River was expected to vary during the time required to collect the entire sample, a volume-weighted composite sample of the prefiltered Suwannee River water was prepared by collecting and combining 10-mL aliquots at periodic intervals (every 40 gallons). The composite sample, which was stored on ice at all times, had a pH of 3.93 and a TOC concentration of 39.2 mg/L (3.27 mmol/L).

While a sample was being concentrated, it was circulated continuously through a cation exchange resin ( $\text{H}^+$ -form) to remove most major cations. The "field-desalted" concentrated samples had pH values of  $2.8 \pm 0.1$ , well below the average pH of 3.93 for the prefiltered water. During the operation of the reverse osmosis system, the permeate flow rate gradually decreased due to adsorption of organic matter on the reverse osmosis membranes. At the low pH values of the concentrated samples, the adsorbed organic matter was probably enriched in humic acids. To recover this organic matter and to increase the permeate flow rate, a single 12-liter solution of 0.01 M NaOH was used on three occasions (about once every three days) to rinse the reverse osmosis membranes. Its final pH was about 6.5.

The samples were transported to Dr. Perdue's laboratory at Georgia Tech on May 10, 1999. In the laboratory, the reverse osmosis membranes were rinsed a final time with 10 liters of 0.01 M NaOH to recover some additional adsorbed organic matter. The two

NaOH rinse solutions were desalted using a cation exchange resin (H<sup>+</sup>-form) and then mixed into the other 33 concentrated samples. The concentrated samples were then desalted for a final time, using 250-ml columns of cation exchange resin (H<sup>+</sup>-form) at a flow rate of about 100 ml/min. A volume-weighted composite sample was prepared from the desalted, concentrated samples. Its pH was 2.54 and its TOC concentration was 725 mg/L (60.4 mmol/L). From the volumes and TOC concentrations of the prefiltered water and the final concentrated samples, the percent recovery of organic carbon was calculated to be 92.9%.

During the three weeks that the samples were being processed in Dr. Perdue's laboratory at Georgia Tech, they were stored in a cold room at 4-6 °C. For two days, while the cold room was not operational, the samples were cooled with ice.

On May 31, the 31 carboys of desalted, concentrated samples were shipped by truck to Van Drunen Farms in Momence, IL, where they were stored in a cold room until an IHSS representative could arrive to supervise the freeze-drying process. Finally, on June 7-9, the samples were freeze-dried under the supervision of Dr. Perdue. Approximately 1060 g of freeze-dried natural organic matter was obtained. The freeze-dried product was transferred back to Georgia Tech for pulverization, homogenization, and final drying.

**Location and isolation method information for Nordic reservoir NOM (Courtesy of the International Humic Substances Society)**

This sample was obtained from a drinking water reservoir at Vallsjøen, Skarnes, Norway on October 29 to November 3, 1997 under the direction of Egil Gjessing. The reservoir is at 225 m above sea level and has a maximum depth of about 14 m. The sample was obtained from the Sør-Odal County Waterworks intake pipe that draws water from at depth of 10m (pH = 5.6, EC = 2.1 mS/m and DOC = 10.7 mg/L). The water temperature was 4o C.

The initial concentration was done using a RealSoft PROS/2S portable reverse osmosis system (Serkiz & Perdue). The water was first pumped through a sodium saturated Dowex -50 cation exchanger. No filtration was used. The permeate was discarded and the retentate was recirculated back to the sample reservoir. For every 1 m<sup>3</sup> of water isolated, the RO membrane and the cation exchanger were back washed with 0.006 M NaOH. The resulting 130 L of RO-isolate was concentrated further by roto evaporation. The temperature of the concentrate did not at any time exceed 25o C during this low-pressure evaporation. The remaining 10 L of concentrate containing about 250 mg of C was filtered under 7 atmospheres of pressure through 142 mm Sartorius membrane filters with nominal pore size of 0.45 µm. The filtered concentrate was freeze dried. The Nordic Chapter of the IHSS distributed the Nordic NOM sample until 2001 when it became part of the IHSS collection.

**Reference:**

Serkiz, S.M. and Perdue, E.M. (1990) Isolation of dissolved organic matter from Suwannee River using reverse osmosis. *Water Res.* **24**, 911 - 916.
